# Supplementary material for: Copper-catalyzed synthesis of benzo[4,5]thiazolo[3,2-a]indoles from elemental sulfur and 1-(2-iodophenyl)-1H-indoles
Source: Royal Society of Chemistry journal article supplement (doi:10.1039/d2nj05660g), 2022-12-22

# Copper-catalyzed synthesis of benzo[4,5]thiazolo[3,2-*a*]indoles from element sulfur and 1-(2-iodophenyl)-1*H*-indoles

## Supporting Information

Zongkang Wang,<sup>a</sup> Yang Yuan,<sup>a</sup> Shuxin Jin,<sup>a</sup> Ye Wang,<sup>a</sup> Yingge Gu,<sup>a</sup> Chengyu Wang<sup>b</sup>,  
\* and Yanzhong Li<sup>a,\*</sup>

<sup>a</sup>School of Chemistry and Molecular Engineering, East China Normal University, 500 Dongchuan Road

E-mail: yzli@chem.ecnu.edu.cn

<sup>b</sup>School of Chemistry and Chemical Engineering, Linyi University, Shuangling Road, Linyi, Shandong, 276000, China

E-mail: wangchengyu@lyu.edu.cn

## Table of Contents

|                                                                                |     |
|--------------------------------------------------------------------------------|-----|
| 1. General methods.....                                                        | S2  |
| 2. Synthesis of materials. ....                                                | S2  |
| 3. Synthesis of <b>2</b> .....                                                 | S5  |
| 4. <b>Table S1.</b> Optimization of the Reaction Conditions.....               | S12 |
| 5. Gram scales .....                                                           | S13 |
| 6. Transformations of benzo[4,5]thiazolo[3,2- <i>a</i> ]indole <b>2a</b> ..... | S13 |
| 7. Control Experiment.....                                                     | S15 |
| 8. References .....                                                            | S20 |
| 9. Copies of spectra of products .....                                         | S21 |
| 10. X-ray crystallography of compound <b>2a</b> .....                          | S46 |

## 1. General methods

Unless noted, all reactions were carried out under air and all commercial reagents were without further purification. Reactions were monitored by thin layer chromatography. Purification of reaction products was carried out by flash chromatography on silica gel (200~300 mesh).  $^1\text{H}$  NMR spectra were recorded at 500 MHz or 600 MHz,  $^{13}\text{C}$  NMR spectra were recorded at 125 MHz or 150 MHz, and in  $\text{CDCl}_3$  (containing 0.03% TMS) solutions.  $^1\text{H}$  NMR spectra were recorded with tetramethylsilane ( $\delta = 0.00$  ppm) as internal reference;  $^{13}\text{C}$  NMR spectra were recorded with  $\text{CDCl}_3$  ( $\delta = 77.00$  ppm) as internal reference. High-resolution mass spectra were performed on a mass spectrometer with a TOF (for EI or ESI) or FT-ICR (for MALDI) analyzer. Single crystal X-ray diffraction data was collected in Bruker SMARTAPEX diffractometers with molybdenum cathodes.

## 2. Synthesis of materials

The indole iodobenzenes **1a**, **1b**, **1c**, **1d**, **1e**, **1f**, **1g**, **1h**, **1j**, **1k**, **1m**, **1n**, **1o**, **1p** were synthesized according to reference 1.

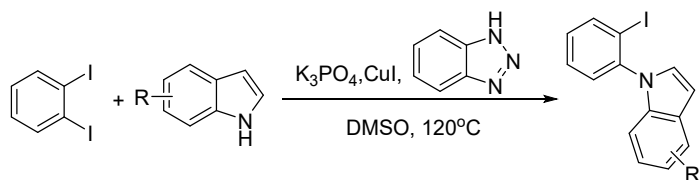

To a Schlenk tube was added indoles (11 mmol), 1,2-diiodobenzene (10 mmol), copper(I) iodide (1.0 mmol), benzotriazole (2.0 mmol) and tripotassium phosphate (20 mmol). Then, the flask was evacuated under reduced pressure and was charged with argon. 25 mL of DMSO was injected into the flask. The reaction mixture was stirred and then was heated at  $120^\circ\text{C}$  for 24 to 48 h. The reaction mixture was cooled to room temperature, diluted with ethyl acetate, filtered on a Celite, washed by water and extracted with ethyl acetate. The residues concentrated in vacuo were purified by chromatography on silica gel using petroleum ether to give the corresponding aryl iodide.

**1q** was synthesized according to reference 2.

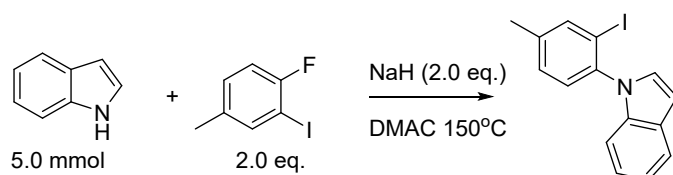

In a dried Schlenk tube, indole (5.0 mmol) and sodium hydride (10.0 mmol) were added at room temperature. Then a solution of 1-fluoro-2-iodo-4-methylbenzene (10.0 mmol) dissolved in 20 mL DMAC was introduced into the reaction mixture by a syringe. The resulting mixture was continually stirred at 150 °C in oil bath for 12 hours and indole was almost completely consumed determined by TLC analysis. Finally, saturated  $\text{NH}_4\text{Cl}$  was added to the mixture, and extracted with ethyl acetate. The combined organic phases were dried over anhydrous  $\text{Na}_2\text{SO}_4$ . After being filtrated through celite and concentrated, the residue was purified by column chromatography on silica gel eluting with PE.

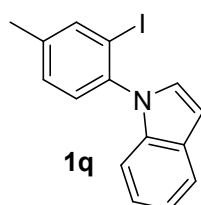

**1-(2-iodo-4-methylphenyl)-1H-indole (1q)** Yellow solid, isolated yield: 32%; mp: 77-79 °C;  $^1\text{H}$  NMR (500 MHz,  $\text{CDCl}_3$ , TMS) :  $\delta$  7.84 (s, 1H), 7.69 (d,  $J = 7.0$  Hz, 1H), 7.29-7.23 (m, 2H), 7.20-7.13 (m, 3H), 7.03 (d,  $J = 7.0$  Hz, 1H), 6.68 (d,  $J = 3.0$  Hz, 1H), 2.41 (s, 3H);  $^{13}\text{C}$  NMR (125 MHz,  $\text{CDCl}_3$ , TMS):  $\delta$  140.40, 140.22, 139.39, 136.75, 129.92, 128.84, 128.67, 128.27, 122.13, 120.88, 120.09, 110.66, 102.80, 97.49, 20.63; HRMS (ESI)  $m/z$ :  $[\text{M}+\text{H}]^+$  calcd for  $\text{C}_{15}\text{H}_{13}\text{IN}$  334.0087, found 334.0085.

**1i, 1l, 1r** were synthesized by the follow method.

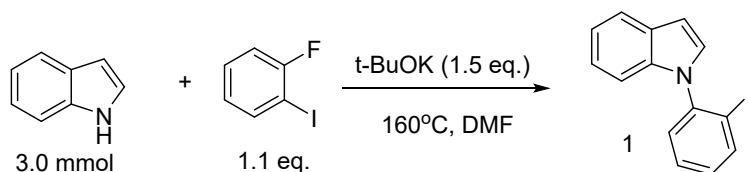

In a sealed tube, indoles (3.0 mmol), *o*-fluoroiodobenzenes (3.3 mmol), *t*-BuOK (4.5mmol, 504.9 mg) and DMF (10.0mL) were stirred at 160 °C (oil bath) under  $\text{N}_2$ . After the reaction was completed as monitored by thin-layer chromatography, the reaction mixture was then quenched by water, and the water layers were extracted with ethyl acetate. The combined organic layers were washed with brine, dried over

anhydrous Na<sub>2</sub>SO<sub>4</sub>. After removal of the EA, the residue was purified by chromatography on silica gel to afford **1**.

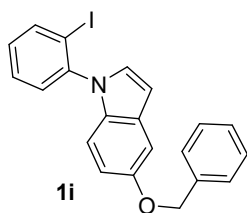

**5-(benzyloxy)-1-(2-iodophenyl)-1H-indole (1i)** White solid, isolated yield: 76%; mp: 101-103 °C; <sup>1</sup>H NMR (500 MHz, CDCl<sub>3</sub>, TMS) : δ 8.01 (d, *J* = 8.5 Hz, 1H), 7.52-7.44 (m, 3H), 7.41-7.30 (m, 4H), 7.26-7.21 (m, 1H), 7.19-7.14 (m, 2H), 6.97-6.90 (m, 2H), 6.61 (d, *J* = 3.0 Hz, 1H), 5.12 (s, 2H); <sup>13</sup>C NMR (125 MHz, CDCl<sub>3</sub>, TMS): δ 153.75, 142.09, 140.14, 137.63, 132.09, 129.78, 129.30, 129.16, 129.12, 128.74, 128.51, 127.76, 127.54, 113.13, 111.45, 103.98, 102.75, 97.54, 70.74; HRMS (ESI) *m/z*: [M+Na]<sup>+</sup> calcd for C<sub>21</sub>H<sub>16</sub>INNaO 448.0169, found 448.0169.

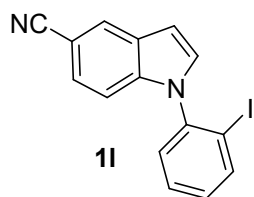

**1-(2-iodophenyl)-1H-indole-5-carbonitrile (1l)** White solid, isolated yield: 64%; mp: 132-134 °C; <sup>1</sup>H NMR (500 MHz, CDCl<sub>3</sub>, TMS) : δ 8.06-8.03 (m, 2H), 7.55-7.50 (m, 1H), 7.43-7.36 (m, 2H), 7.30 (d, *J* = 3.0 Hz, 1H), 7.25-7.22 (m, 1H), 7.07 (d, *J* = 7.0 Hz, 1H), 6.78-6.75 (m, 1H); <sup>13</sup>C NMR (125 MHz, CDCl<sub>3</sub>, TMS): δ 140.92, 140.35, 138.14, 130.84, 130.66, 129.47, 129.21, 128.11, 126.59, 125.32, 120.56, 111.59, 103.82, 103.54, 97.34; HRMS (ESI) *m/z*: [M+Na]<sup>+</sup> calcd for C<sub>15</sub>H<sub>9</sub>IN<sub>2</sub>Na 366.9703, found 366.9701.

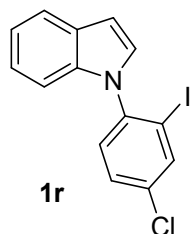

**1-(4-chloro-2-iodophenyl)-1H-indole (1r)** Yellow oil, isolated yield: 23%; <sup>1</sup>H NMR (500 MHz, CDCl<sub>3</sub>, TMS) : δ 8.05-7.98 (m, 1H), 7.70-7.66 (m, 1H), 7.46-7.42 (m, 1H), 7.30-7.11 (m, 4H), 7.05-7.00 (m, 1H), 6.69 (d, *J* = 3.0 Hz, 1H); <sup>13</sup>C NMR (125 MHz, CDCl<sub>3</sub>, TMS): δ 140.81, 139.48, 136.57, 134.72, 129.80, 129.40, 128.41, 128.33, 122.47, 121.06, 120.43, 110.48, 103.50, 97.86; HRMS (ESI) *m/z*: [M+H]<sup>+</sup> calcd for C<sub>14</sub>H<sub>10</sub>ClIN 353.9541, found 353.9537.

### 3. Synthesis of 2.

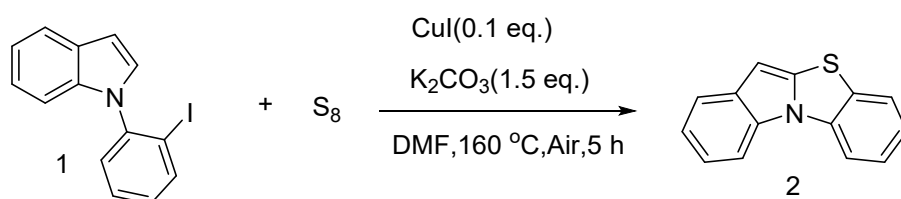

In a sealed tube, indole iodobenzenes **1** (0.4 mmol),  $S_8$  (0.4 mmol, 102.6 mg),  $CuI$  (0.04 mmol, 7.6 mg),  $K_2CO_3$  (0.6 mmol, 82.9 mg) and DMF (4.0 mL) were stirred at 160 °C (oil bath) under air. After the reaction was completed as monitored by thin-layer chromatography, the reaction mixture was then quenched by water, and the water layers were extracted with ethyl acetate (15 mL  $\times$  3). The combined organic layers were washed with brine, dried over anhydrous  $Na_2SO_4$ . After removal of the EA, the residue was purified by chromatography on silica gel to afford **2**.

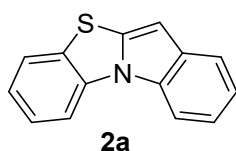

**benzo[4,5]thiazolo[3,2-a]indole (2a)**. Yellow solid, obtained in 5 h and purified by chromatography on silica gel (petroleum ether); yield: 93%, 82.8 mg, m.p. 106-108 °C.

$^1H$  NMR (500 MHz,  $CDCl_3$ )  $\delta$  8.01-7.96 (m, 1H), 7.94 (d,  $J = 8.5$  Hz, 1H), 7.69-7.63 (m, 1H), 7.59 (d,  $J = 8.0$  Hz, 1H), 7.45-7.40 (m, 1H), 7.30-7.25 (m, 2H), 7.24-7.19 (m, 1H), 6.57 (s, 1H).  $^{13}C$  NMR (125 MHz,  $CDCl_3$ )  $\delta$  136.25, 135.86, 133.32, 131.12, 130.51, 126.00, 123.60, 122.95, 121.46, 120.41, 120.00, 111.96, 110.87, 93.08. HRMS (ESI)  $m/z$ :  $[M+H]^+$  calcd for  $C_{14}H_{10}NS$  224.0529, found 224.0529.

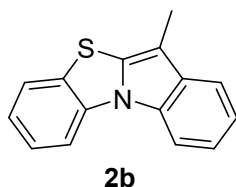

**11-methylbenzo[4,5]thiazolo[3,2-a]indole (2b)**. Yellow solid, obtained in 7 h (**1b** was consumed completely and polysulfide intermediates were observed) and purified by chromatography on silica gel (petroleum ether); yield: 45%, 42.4 mg, m.p. 67-69 °C.

$^1H$  NMR (500 MHz,  $CDCl_3$ )  $\delta$  7.98-7.92 (m, 1H), 7.89 (d,  $J = 8.0$  Hz, 1H), 7.64-7.57 (m, 2H), 7.45-7.39 (m, 1H), 7.33-7.27 (m, 2H), 7.22-7.17 (m, 1H), 2.39 (s, 3H).  $^{13}C$  NMR (125 MHz,  $CDCl_3$ )  $\delta$  136.19, 133.11, 132.92, 130.95, 130.35, 125.97, 123.70,

122.50, 120.84, 120.22, 117.88, 111.67, 110.75, 101.30, 9.38. HRMS (ESI)  $m/z$ :  $[M+H]^+$  calcd for  $C_{15}H_{12}NS$  238.0685, found 238.0676.

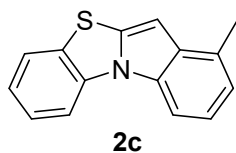

**1-methylbenzo[4,5]thiazolo[3,2-a]indole (2c).** White solid, obtained in 5 h and purified by chromatography on silica gel (petroleum ether); yield: 89%, 84.9 mg, m.p. 129-131 °C.  $^1H$  NMR (500 MHz,  $CDCl_3$ )  $\delta$  7.95 (d,  $J = 8.0$  Hz, 1H), 7.84 (d,  $J=8.0$  Hz, 1H), 7.60 (d,  $J = 8.0$  Hz, 1H), 7.46-7.40 (m, 1H), 7.25-7.18 (m, 2H), 7.09 (d,  $J = 6.5$  Hz, 1H), 6.59 (s, 1H), 2.60 (s, 3H).  $^{13}C$  NMR (125 MHz,  $CDCl_3$ )  $\delta$  135.97, 135.59, 133.12, 130.82, 130.60, 129.35, 125.98, 123.59, 122.93, 121.73, 120.52, 111.99, 108.52, 91.60, 18.90. HRMS (ESI)  $m/z$ :  $[M+Na]^+$  calcd for  $C_{15}H_{11}NNaS$  260.0504, found 260.0498.

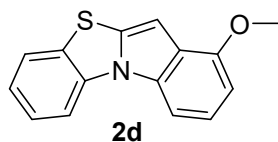

**1-methoxybenzo[4,5]thiazolo[3,2-a]indole (2d).** Yellow solid, obtained in 8 h and purified by chromatography on silica gel (petroleum ether); yield: 63%, 64.0 mg, m.p. 166-168 °C.  $^1H$  NMR (500 MHz,  $CDCl_3$ )  $\delta$  7.90 (d,  $J = 8.5$  Hz, 1H), 7.62-7.55 (m, 2H), 7.43-7.37 (m, 1H), 7.24-7.17 (m, 2H), 6.71 (d,  $J = 8.0$  Hz, 1H), 6.67 (s, 1H), 3.98 (s, 3H).  $^{13}C$  NMR (125 MHz,  $CDCl_3$ )  $\delta$  152.15, 135.81, 134.35, 132.17, 130.77, 125.88, 123.70, 123.56, 123.02, 121.28, 112.04, 104.38, 101.56, 90.32, 55.42. HRMS (ESI)  $m/z$ :  $[M+Na]^+$  calcd for  $C_{15}H_{11}NNaOS$  276.0464, found 276.0447.

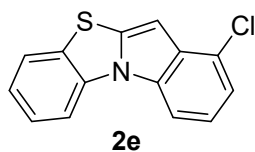

**1-chlorobenzo[4,5]thiazolo[3,2-a]indole (2e).** White solid, obtained in 7 h (**1e** was consumed completely and polysulfide intermediates were observed) and purified by chromatography on silica gel (petroleum ether); yield: 50%, 51.2 mg, m.p. 140-142 °C.  $^1H$  NMR (500 MHz,  $CDCl_3$ )  $\delta$  7.90-7.80 (m, 2H), 7.58 (d,  $J = 8.0$  Hz, 1H), 7.45-7.38 (m, 1H), 7.29-7.20 (m, 2H), 7.19-7.12 (m, 1H), 6.66 (s, 1H).  $^{13}C$  NMR (125 MHz,  $CDCl_3$ )  $\delta$  137.15, 135.46, 131.80, 131.54, 130.52, 126.11, 124.72, 123.70,

123.46, 121.20, 120.82, 112.11, 109.33, 91.66. HRMS (ESI)  $m/z$ :  $[M+H]^+$  calcd for  $C_{14}H_9ClNS$  258.0139, found 258.0140.

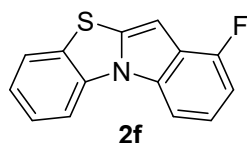

**1-fluorobenzo[4,5]thiazolo[3,2-a]indole (2f)**. Yellow solid, obtained in 8 h and purified by chromatography on silica gel (petroleum ether); yield: 64%, 61.9 mg, m.p. 106-108 °C.  $^1H$  NMR (500MHz,  $CDCl_3$ )  $\delta$  7.85 (d,  $J = 8.5$  Hz, 1H), 7.69 (d,  $J = 8.5$  Hz, 1H), 7.55 (d,  $J = 8.0$  Hz, 1H), 7.42-7.35 (m, 1H), 7.24-7.11 (m, 2H), 6.97-6.90 (m, 1H), 6.61 (s, 1H).  $^{13}C$  NMR (125 MHz,  $CDCl_3$ )  $\delta$  154.90 (d,  $J_{C-F} = 245.4$  Hz), 136.34, 135.37, 133.16 (d,  $J_{C-F} = 11.3$  Hz), 130.54, 126.04, 123.62, 123.38, 122.08 (d,  $J_{C-F} = 22.3$  Hz), 120.81 (d,  $J_{C-F} = 7.6$  Hz), 112.06, 106.99 (d,  $J_{C-F} = 3.6$  Hz), 106.48 (d,  $J_{C-F} = 18.8$  Hz), 88.91. HRMS (ESI)  $m/z$ :  $[M+H]^+$  calcd for  $C_{14}H_9FNS$  242.0434, found 242.0434.

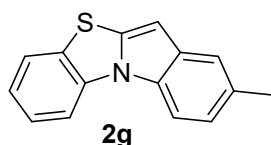

**2-methylbenzo[4,5]thiazolo[3,2-a]indole (2g)**. Light yellow solid, obtained in 5 h and purified by chromatography on silica gel (petroleum ether); yield: 89%, 83.6 mg, m.p. 89-91 °C.  $^1H$  NMR (500 MHz,  $CDCl_3$ )  $\delta$  7.88 (d,  $J = 8.0$  Hz, 1H), 7.84 (d,  $J = 8.5$  Hz, 1H), 7.57 (d,  $J = 7.0$  Hz, 1H), 7.45-7.37 (m, 2H), 7.21-7.16 (m, 1H), 7.10-7.06 (m, 1H), 6.47 (s, 1H), 2.50 (s, 3H).  $^{13}C$  NMR (125 MHz,  $CDCl_3$ )  $\delta$  136.17, 135.89, 133.61, 130.87, 130.42, 129.45, 125.93, 123.53, 122.70, 121.85, 119.80, 111.76, 110.45, 92.64, 21.55. HRMS (ESI)  $m/z$ :  $[M+H]^+$  calcd for  $C_{15}H_{12}NS$  238.0685, found 238.0686.

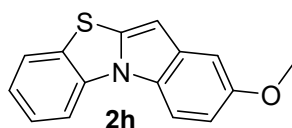

**2-methoxybenzo[4,5]thiazolo[3,2-a]indole (2h)**. Yellow solid, obtained in 8 h and purified by chromatography on silica gel (petroleum ether); yield: 78%, 79.0 mg, m.p. 100-102 °C.  $^1H$  NMR (500 MHz,  $CDCl_3$ )  $\delta$  7.87-7.80 (m, 2H), 7.56 (d,  $J = 7.5$  Hz,

1H), 7.42-7.36 (m, 1H), 7.20-7.15 (m, 1H), 7.11 (d,  $J = 2.5$  Hz, 1H), 6.92-6.87 (m, 1H), 6.47 (s, 1H), 3.88 (s, 3H).  $^{13}\text{C}$  NMR (125 MHz,  $\text{CDCl}_3$ )  $\delta$  155.13, 136.77, 135.76, 134.10, 130.22, 126.30, 125.95, 123.54, 122.61, 111.44, 111.40, 109.83, 102.14, 92.85, 55.70. HRMS (ESI)  $m/z$ :  $[\text{M}+\text{H}]^+$  calcd for  $\text{C}_{15}\text{H}_{12}\text{NOS}$  254.0634, found 254.0634.

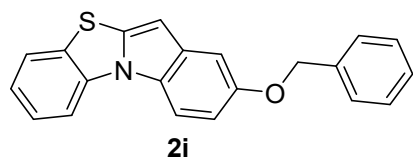

**2-(benzyloxy)benzo[4,5]thiazolo[3,2-a]indole (2i).** Yellow solid, obtained in 9 h and purified by chromatography on silica gel (PE:EA=20:1); yield: 92%, 120.9 mg, m.p. 120-122 °C.  $^1\text{H}$  NMR (500 MHz,  $\text{CDCl}_3$ )  $\delta$  7.90-7.83 (m, 2H), 7.59 (d,  $J = 8.0$  Hz, 1H), 7.52-7.47 (m, 2H), 7.44-7.37 (m, 3H), 7.36-7.30 (m, 1H), 7.23-7.18 (m, 2H), 7.02-6.97 (m, 1H), 6.49 (s, 1H), 5.15 (s, 2H).  $^{13}\text{C}$  NMR (125 MHz,  $\text{CDCl}_3$ )  $\delta$  154.31, 137.41, 136.84, 135.76, 134.05, 130.23, 128.54, 127.84, 127.53, 126.46, 125.98, 123.57, 122.67, 111.49, 111.44, 110.59, 103.63, 92.90, 70.65. HRMS (ESI)  $m/z$ :  $[\text{M}+\text{H}]^+$  calcd for  $\text{C}_{21}\text{H}_{16}\text{NOS}$  330.0947, found 330.0947.

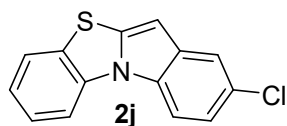

**2-chlorobenzo[4,5]thiazolo[3,2-a]indole (2j).** White solid, obtained in 5 h and purified by chromatography on silica gel (petroleum ether); yield: 77%, 79.2 mg, m.p. 129-131 °C.  $^1\text{H}$  NMR (500 MHz,  $\text{CDCl}_3$ )  $\delta$  7.86-7.78 (m, 2H), 7.57 (d,  $J = 8.0$  Hz, 2H), 7.43-7.37 (m, 1H), 7.25-7.16 (m, 2H), 6.47 (s, 1H).  $^{13}\text{C}$  NMR (125 MHz,  $\text{CDCl}_3$ )  $\delta$  137.84, 135.42, 134.25, 130.36, 129.36, 127.12, 126.11, 123.69, 123.27, 120.44, 119.35, 111.90, 111.53, 92.70. HRMS (ESI)  $m/z$ :  $[\text{M}+\text{H}]^+$  calcd for  $\text{C}_{14}\text{H}_9\text{ClNS}$  258.0139, found 258.0141.

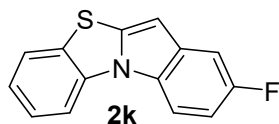

**2-fluorobenzo[4,5]thiazolo[3,2-a]indole (2k).** White solid, obtained in 5 h and purified by chromatography on silica gel (petroleum ether); yield: 83%, 80.3 mg, m.p. 110-112 °C.  $^1\text{H}$  NMR (500 MHz,  $\text{CDCl}_3$ )  $\delta$  7.89-7.82 (m, 2H), 7.59 (d,  $J = 7.5$  Hz, 1H), 7.44-7.39 (m, 1H), 7.29 (dd,  $J_1 = 2.5$  Hz,  $J_2 = 9.5$  Hz, 1H), 7.25-7.19 (m, 1H), 7.03-6.96 (m, 1H), 6.51 (s, 1H).  $^{13}\text{C}$  NMR (125 MHz,  $\text{CDCl}_3$ )  $\delta$  158.62 (d,  $J_{\text{C-F}} = 235.6$  Hz), 138.07, 135.56, 133.93 (d,  $J_{\text{C-F}} = 10.4$  Hz), 130.24, 127.74, 126.09, 123.68,



123.07, 111.62, 111.30 (d,  $J_{C-F} = 9.9$  Hz), 108.34 (d,  $J_{C-F} = 26.0$  Hz), 105.14 (d,  $J_{C-F} = 23.9$  Hz), 93.11 (d,  $J_{C-F} = 4.3$  Hz). HRMS (ESI)  $m/z$ :  $[M+H]^+$  calcd for  $C_{14}H_9FNS$  242.0434, found 242.0434.

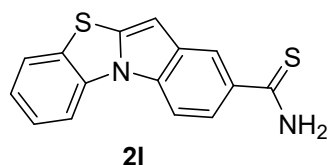

**benzo[4,5]thiazolo[3,2-a]indole-2-carbothioamide (21)**. Yellow solid, obtained in 12 h (**11** was consumed completely and polysulfide intermediates were observed) and purified by chromatography on silica gel (PE:EA=2:1); yield:44%, 50.0 mg, m.p. 201-203 °C.  $^1H$  NMR (600 MHz,  $CDCl_3$ )  $\delta$  8.27 (s, 1H), 7.97 (d,  $J = 9.0$  Hz, 2H), 7.89-7.84 (m, 1H), 7.64 (d,  $J = 7.8$  Hz, 1H), 7.60 (s, 1H), 7.50-7.46 (m, 1H), 7.32-7.27 (m, 2H), 6.66 (s, 1H).  $^{13}C$  NMR (125 MHz, DMSO)  $\delta$  200.84, 137.78, 135.03, 133.26, 132.39, 132.24, 130.38, 127.25, 124.87, 124.59, 121.13, 120.10, 113.30, 110.97, 95.05. HRMS (ESI)  $m/z$ :  $[M+H]^+$  calcd for Chemical Formula:  $C_{15}H_{11}N_2S_2$  283.0358, found 283.0352.

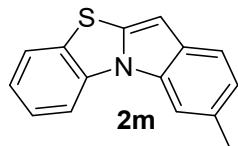

**3-methylbenzo[4,5]thiazolo[3,2-a]indole (2m)**. Light yellow solid, obtained in 5 h and purified by chromatography on silica gel (petroleum ether/ethyl acetate = 10:1); yield: 88%, 83.2 mg, m.p. 88-90 °C.  $^1H$  NMR (500 MHz,  $CDCl_3$ )  $\delta$  7.88 (d,  $J = 8.0$  Hz, 1H), 7.74 (s, 1H), 7.53-7.50 (m, 2H), 7.39-7.35 (m, 1H), 7.20-7.07 (m, 2H), 6.47 (s, 1H), 2.55 (s, 3H).  $^{13}C$  NMR (125 MHz,  $CDCl_3$ )  $\delta$  135.86, 135.26, 131.45, 131.08, 130.51, 130.17, 125.83, 123.47, 123.01, 122.74, 119.54, 111.86, 111.04, 92.86, 21.90. HRMS (ESI)  $m/z$ :  $[M+H]^+$  calcd for  $C_{15}H_{12}NS$  238.0685, found 238.0686.

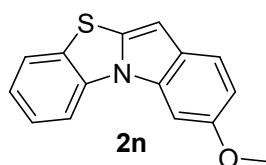

**3-methoxybenzo[4,5]thiazolo[3,2-a]indole (2n).** Yellow solid, obtained in 5 h and purified by chromatography on silica gel (petroleum ether); yield: 88%, 89.6 mg, m.p. 94-96 °C. <sup>1</sup>H NMR (500 MHz, CDCl<sub>3</sub>) δ 7.86 (d, *J* = 8.0 Hz, 1H), 7.57 (d, *J* = 8.0 Hz, 1H), 7.53 (d, *J* = 9.0 Hz, 1H), 7.48 (d, *J* = 2.5 Hz, 1H), 7.44-7.39 (m, 1H), 7.23-7.18 (m, 1H), 6.98-6.92 (m, 1H), 6.48 (s, 1H), 3.95 (s, 3H). <sup>13</sup>C NMR (125 MHz, CDCl<sub>3</sub>) δ 155.09, 135.75, 134.46, 131.54, 130.70, 127.57, 125.84, 123.59, 122.92, 120.37, 111.76, 110.31, 96.05, 92.81, 56.03. HRMS (ESI) *m/z*: [M+H]<sup>+</sup> calcd for C<sub>15</sub>H<sub>12</sub>NOS 254.0634, found 254.0634.

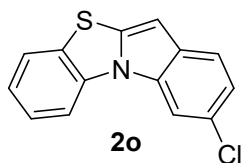

**3-chlorobenzo[4,5]thiazolo[3,2-a]indole (2o).** Yellow solid, obtained in 5 h and purified by chromatography on silica gel (petroleum ether); yield: 68%, 70.3 mg, m.p. 150-152 °C. <sup>1</sup>H NMR (500 MHz, CDCl<sub>3</sub>) δ 7.94 (s, 1H), 7.85 (d, *J* = 8.0 Hz, 1H), 7.58 (d, *J* = 6.5 Hz, 1H), 7.53 (d, *J* = 8.5 Hz, 1H), 7.46-7.40 (m, 1H), 7.27-7.20 (m, 2H), 6.52 (s, 1H). <sup>13</sup>C NMR (125 MHz, CDCl<sub>3</sub>) δ 136.96, 135.31, 131.70, 131.05, 130.46, 126.18, 126.14, 123.70, 123.43, 122.01, 120.59, 112.03, 110.98, 93.10. HRMS (ESI) *m/z*: [M+H]<sup>+</sup> calcd for C<sub>14</sub>H<sub>9</sub>ClNS 258.0139, found 258.0145.

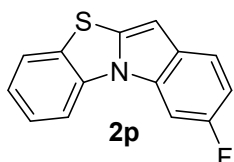

**3-fluorobenzo[4,5]thiazolo[3,2-a]indole (2p).** Yellow solid, obtained in 5 h and purified by chromatography on silica gel (petroleum ether); yield: 76%, 73.2 mg, m.p. 129-131 °C. <sup>1</sup>H NMR (500 MHz, CDCl<sub>3</sub>) δ 7.80 (d, *J* = 8.0 Hz, 1H), 7.67-7.62 (m, 1H), 7.59-7.51 (m, 2H), 7.44-7.38 (m, 1H), 7.25-7.19 (m, 1H), 7.07-7.00 (m, 1H), 6.51 (s, 1H). <sup>13</sup>C NMR (125 MHz, CDCl<sub>3</sub>) δ 158.43 (d, *J*<sub>C-F</sub> = 236.3 Hz), 136.20 (d, *J*<sub>C-F</sub> = 3.3 Hz), 135.34, 130.52, 130.34 (d, *J*<sub>C-F</sub> = 12.0 Hz), 129.60, 126.02, 123.66, 123.30, 120.39 (d, *J*<sub>C-F</sub> = 9.8 Hz), 111.82, 109.84 (d, *J*<sub>C-F</sub> = 23.9 Hz), 97.97 (d, *J*<sub>C-F</sub> = 27.4 Hz), 92.95. HRMS (ESI) *m/z*: [M+H]<sup>+</sup> calcd for C<sub>14</sub>H<sub>9</sub>FNS 242.0434, found 242.0438.

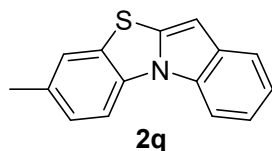

**8-methylbenzo[4,5]thiazolo[3,2-a]indole (2q).** Yellow solid, obtained in 5 h and purified by chromatography on silica gel (petroleum ether); yield: 81%, 76.7 mg, m.p. 80-82 °C. <sup>1</sup>H NMR (500 MHz, CDCl<sub>3</sub>) δ 7.94-7.90 (m, 1H), 7.76 (d, *J* = 8.0 Hz, 1H), 7.66-7.61 (m, 1H), 7.34 (s, 1H), 7.27-7.22 (m, 2H), 7.16 (d, *J* = 8.5 Hz, 1H), 6.52 (s, 1H), 2.39 (s, 3H). <sup>13</sup>C NMR (125 MHz, CDCl<sub>3</sub>) δ 136.28, 133.70, 133.13, 132.82, 130.98, 130.51, 126.68, 123.86, 121.19, 120.22, 119.91, 111.52, 110.73, 92.77, 21.05. HRMS (ESI) *m/z*: [M+H]<sup>+</sup>calcd for C<sub>15</sub>H<sub>12</sub>NS 238.0685, found 238.0687.

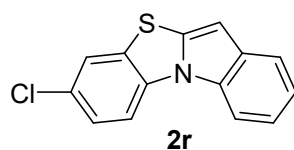

**8-chlorobenzo[4,5]thiazolo[3,2-a]indole (2r).** Yellow solid, obtained in 5 h (**1r** was consumed completely and polysulfide intermediates were observed) and purified by chromatography on silica gel (petroleum ether); yield: 50%, 50.9 mg, m.p. 118-120 °C. <sup>1</sup>H NMR (500 MHz, CDCl<sub>3</sub>) δ 7.93-7.89 (m, 1H), 7.82 (d, *J* = 9.0 Hz, 1H), 7.68-7.64 (m, 1H), 7.56 (d, *J* = 2.4 Hz, 1H), 7.40-7.37 (m, 1H), 7.30-7.27 (m, 2H), 6.57 (s, 1H). <sup>13</sup>C NMR (125 MHz, CDCl<sub>3</sub>) δ 135.83, 134.51, 133.23, 132.22, 130.97, 128.20, 126.10, 123.35, 121.71, 120.75, 120.22, 112.27, 110.68, 93.63. HRMS (ESI) *m/z*: [M+H]<sup>+</sup>calcd for C<sub>14</sub>H<sub>9</sub>ClNS 258.0137, found 258.0133.

#### 4. Table S1. Optimization of the Reaction Conditions<sup>a</sup>

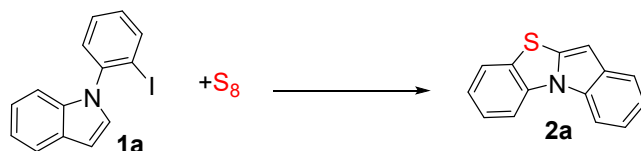

| entry                 | 1a:S <sub>8</sub> | base (equiv.)                           | [Cu]              | solvent     | t (h)    | yield (%) |
|-----------------------|-------------------|-----------------------------------------|-------------------|-------------|----------|-----------|
| 1                     | 1:1.5             | K <sub>2</sub> CO <sub>3</sub> (2)      | -                 | DMF         | 3        | 19        |
| 2                     | 1:1.5             | K <sub>2</sub> CO <sub>3</sub> (2)      | CuI               | DMF         | 3        | 90        |
| 3                     | 1:1.5             | -                                       | CuI               | DMF         | 3        | NP        |
| 4                     | 1:1.5             | K <sub>2</sub> CO <sub>3</sub> (2)      | CuBr              | DMF         | 3        | 89        |
| 5                     | 1:1.5             | K <sub>2</sub> CO <sub>3</sub> (2)      | CuCl              | DMF         | 3        | 85        |
| 6                     | 1:1.5             | K <sub>2</sub> CO <sub>3</sub> (2)      | CuCl <sub>2</sub> | DMF         | 3        | 81        |
| 7                     | 1:1.5             | Et <sub>3</sub> N(2)                    | CuI               | DMF         | 3        | 32        |
| 8                     | 1:1.5             | K <sub>3</sub> PO <sub>4</sub> (2)      | CuI               | DMF         | 3        | 9         |
| 9                     | 1:1.5             | K <sub>2</sub> CO <sub>3</sub> (2)      | CuI               | DMSO        | 3        | trace     |
| 10                    | 1:1.5             | K <sub>2</sub> CO <sub>3</sub> (2)      | CuI               | toluene     | 3        | NR        |
| 11                    | 1:1.5             | K <sub>2</sub> CO <sub>3</sub> (2)      | CuI               | 1,4-dioxane | 3        | NR        |
| 12                    | 1:1.3             | K <sub>2</sub> CO <sub>3</sub> (2)      | CuI               | DMF         | 3        | 90        |
| 13                    | 1:1               | K <sub>2</sub> CO <sub>3</sub> (2)      | CuI               | DMF         | 3        | 89        |
| 14                    | 1:1               | K <sub>2</sub> CO <sub>3</sub> (1.5)    | CuI               | DMF         | 4        | 90        |
| 15                    | 1:1               | K <sub>2</sub> CO <sub>3</sub> (1)      | CuI               | DMF         | 7        | 86        |
| <b>16<sup>b</sup></b> | <b>1:1</b>        | <b>K<sub>2</sub>CO<sub>3</sub>(1.5)</b> | <b>CuI</b>        | <b>DMF</b>  | <b>5</b> | <b>93</b> |
| 17 <sup>c</sup>       | 1:1               | K <sub>2</sub> CO <sub>3</sub> (1.5)    | CuI               | DMF         | 10       | 85        |
| 18 <sup>b,d</sup>     | 1:1               | K <sub>2</sub> CO <sub>3</sub> (1.5)    | CuI               | DMF         | 9        | 55        |
| 19 <sup>b,e</sup>     | 1:1               | K <sub>2</sub> CO <sub>3</sub> (1.5)    | CuI               | DMF         | 5        | 83        |
| 20 <sup>b,f</sup>     | 1:1               | K <sub>2</sub> CO <sub>3</sub> (1.5)    | CuI               | DMF         | 5        | NP        |

<sup>a</sup>Reaction conditions: **1a** (0.4 mmol), S<sub>8</sub> (0.4 mmol), [Cu] (20 mol%), base (0.6 mmol), solvent (4.0 mL), 160°C, air, isolated yields. <sup>b</sup>[Cu] (10 mol%). <sup>c</sup>[Cu] (5 mol%). <sup>d</sup>140°C. <sup>e</sup>N<sub>2</sub> balloon. <sup>f</sup>O<sub>2</sub> balloon. NR= no reaction. NP = no desired product.

## 5. Gram scales

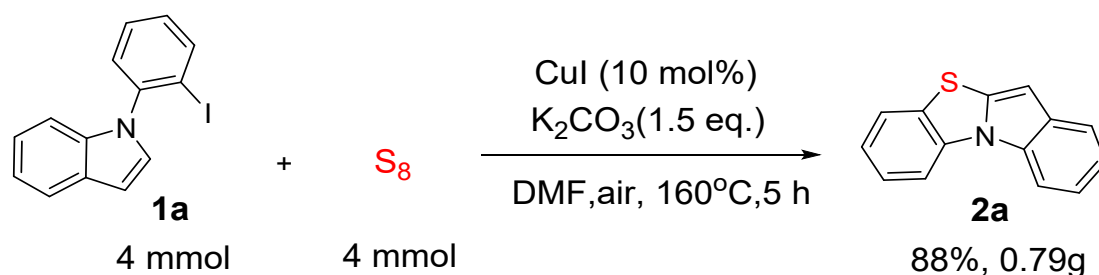

In a sealed tube, 1-(2-iodophenyl)-1H-indole **1a** (4.0 mmol, 1276.6 mg),  $S_8$  (4.0 mmol, 1026.1 mg),  $K_2CO_3$  (6.0 mmol, 829.3 mg), CuI (0.4 mmol, 76.2 mg) and DMF (40.0 mL) were stirred at 160 °C under air. After 5 h, the reaction mixture was cooled to room temperature and was treated with  $H_2O$ , then extracted with EA and washed the organic phase twice with saturated aqueous ammonium chloride solution. After the organic phase was dried with anhydrous  $Na_2SO_4$  and concentrated, the residue was purified by chromatography on silica gel (PE) to afford **2a** (yellow-green solid, 785.9 mg, 88%).

## 6. Transformations of benzo[4,5]thiazolo[3,2-a]indole **2a**

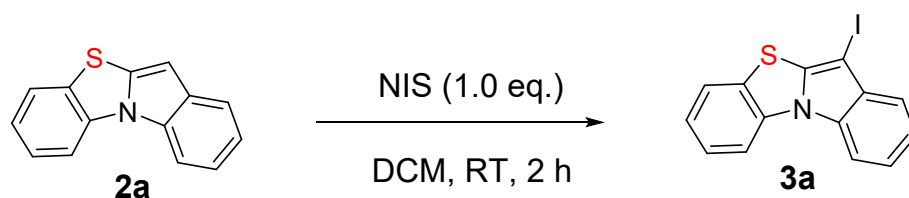

According to the method in reference 3, we synthesized **3a**. To a stirred solution of **2a** (67.0 mg, 0.3 mmol) in DCM (2.0 mL) at room temperature was added N-iodosuccinimide (NIS: 67.5 mg, 0.3 mmol). The reaction mixture was further stirred for 2 h at room temperature. After the reaction was completed as monitored by thin-layer chromatography, added 5 ml of DCM to the reaction system to dilute, and quench with saturated sodium bicarbonate solution. After the aqueous phase was

extracted with DCM, the organic phases were combined and dried over anhydrous  $\text{Na}_2\text{SO}_4$ . After removal of the DCM, the residue was purified by chromatography on silica gel (PE) to afford **3a** (white solid, 95.4 mg, 91%).

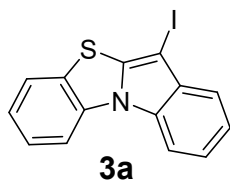

**11-iodobenzo[4,5]thiazolo[3,2-a]indole (3a).** White solid, purified by chromatography on silica gel (petroleum ether); yield: 91%, 95.4 mg, m.p. 165-167 °C.  $^1\text{H}$  NMR (500 MHz,  $\text{CDCl}_3$ )  $\delta$  7.90-7.85 (m, 1H), 7.83 (d,  $J = 8.0$  Hz, 1H), 7.59 (d,  $J = 8.0$  Hz, 1H), 7.47-7.38 (m, 2H), 7.35-7.27 (m, 2H), 7.25-7.19 (m, 1H).  $^{13}\text{C}$  NMR (125 MHz,  $\text{CDCl}_3$ )  $\delta$  140.20, 136.39, 134.47, 131.55, 129.18, 126.23, 123.90, 123.32, 122.12, 121.46, 120.01, 112.10, 110.91, 46.06. HRMS (ESI)  $m/z$ :  $[\text{M}+\text{H}]^+$  calcd for  $\text{C}_{14}\text{H}_9\text{INS}$  349.9495, found 349.9499.

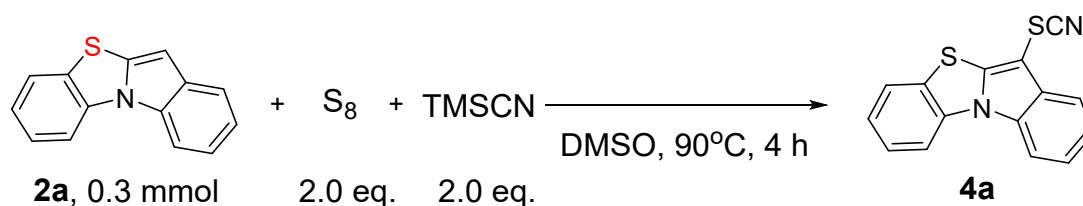

According to the method in reference 4, we synthesized **4a**. To the DMSO (3 ml) solvent containing **2a** (67.0, 0.3 mmol) and sulfur (153.9 mg, 0.6 mmol), added TMSCN (75  $\mu\text{l}$ , 0.6 mmol), and then stirred at 90 °C for 4 h. After the reaction was completed, diluted with EA, and added saturated ammonium chloride aqueous solution to quench. After the organic phase was washed twice with saturated ammonium chloride and dried with anhydrous  $\text{Na}_2\text{SO}_4$ , the organic phase was concentrated in vacuo. Then the residue was purified by chromatography on silica gel (PE:EA=50:1~PE:EA=10:1) to afford **4a** (yellow-green solid, 57.7 mg, 69%).

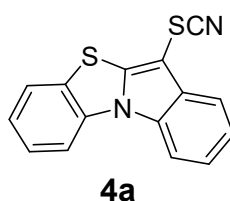

**11-thiocyanatobenzo[4,5]thiazolo[3,2-*a*]indole (4a).** Yellow solid, purified by chromatography on silica gel (PE:EA=50:1~PE:EA=10:1); yield: 69%, 57.7 mg, m.p. 170-172 °C. <sup>1</sup>H NMR (500 MHz, CDCl<sub>3</sub>) δ 7.88-7.81 (m, 2H), 7.73 (d, *J* = 7.5 Hz, 1H), 7.61 (d, *J* = 8.0 Hz, 1H), 7.47-7.41 (m, 1H), 7.39-7.29 (m, 2H), 7.29-7.24 (m, 1H). <sup>13</sup>C NMR (125 MHz, CDCl<sub>3</sub>) δ 145.18, 135.51, 132.68, 131.67, 129.44, 126.71, 124.16, 123.94, 123.13, 122.20, 118.08, 112.80, 111.42, 110.28, 80.64. HRMS (ESI) m/z: [M+H]<sup>+</sup> calcd for C<sub>15</sub>H<sub>9</sub>N<sub>2</sub>S<sub>2</sub> 281.0202, found 281.0204.

## 7. Control Experiment.

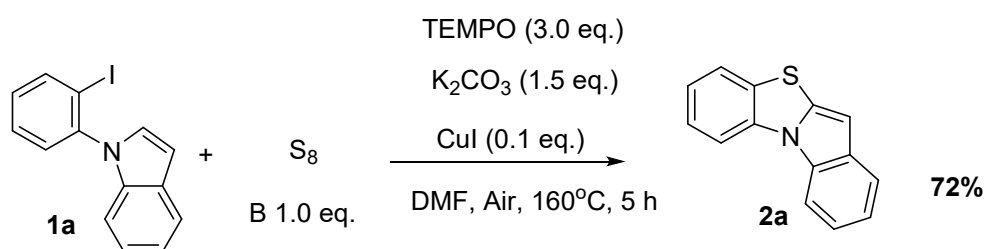

In a sealed tube, indole iodobenzenes **1a** (0.4 mmol), S<sub>8</sub> (0.4 mmol, 102.6 mg), CuI (0.04 mmol, 7.6 mg), K<sub>2</sub>CO<sub>3</sub> (0.6 mmol, 82.9 mg), TEMPO (1.2 mmol, 187.5 mg) and DMF (4.0 mL) were stirred at 160 °C (oil bath) under air. After 5 hours of reaction, the reaction mixture was then quenched by water, and the water layers were extracted with ethyl acetate (15 mL × 3). The combined organic layers were washed with brine, dried over anhydrous Na<sub>2</sub>SO<sub>4</sub>. After removal of the EA, the residue was purified by chromatography on silica gel (PE) to afford **2a** in 72%.

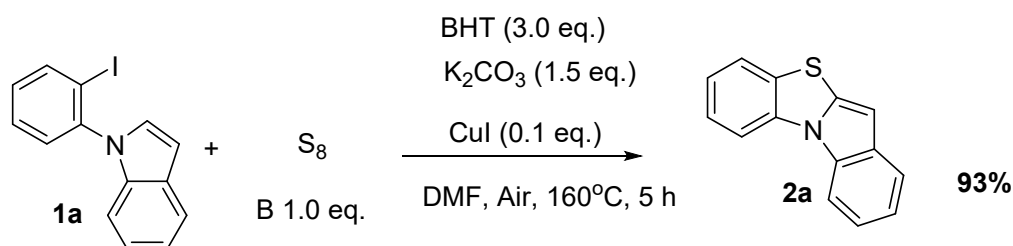

In a sealed tube, indole iodobenzenes **1a** (0.4 mmol), S<sub>8</sub> (0.4 mmol, 102.6 mg), CuI (0.04 mmol, 7.6 mg), K<sub>2</sub>CO<sub>3</sub> (0.6 mmol, 82.9 mg), BHT (1.2 mmol, 187.5 mg) and DMF (4.0 mL) were stirred at 160 °C (oil bath) under air. After 5 hours of reaction, the reaction mixture was then quenched by water, and the water layers were extracted with ethyl acetate (15 mL × 3). The combined organic layers were washed with brine, dried over anhydrous Na<sub>2</sub>SO<sub>4</sub>. After removal of the EA, the residue was purified by chromatography on silica gel (PE) to afford **2a** in 93%.

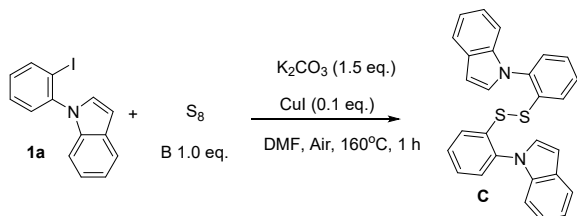

In a sealed tube, indole iodobenzenes **1a** (0.4 mmol),  $S_8$  (0.4 mmol, 102.6 mg),  $CuI$  (0.04 mmol, 7.6 mg),  $K_2CO_3$  (0.6 mmol, 82.9 mg) and DMF (4.0 mL) were stirred at  $160^\circ C$  (oil bath) under air. After 1 hour of reaction, the reaction mixture was then quenched by water, and the water layers were extracted with ethyl acetate (15 mL  $\times$  3). The combined organic layers were washed with brine, dried over anhydrous  $Na_2SO_4$ . After removal of the EA, a sample was extracted from the reaction mixture for ESI-MS analysis.

### Mass Spectrum List Report

| Analysis Info |                                                         | Acquisition Date    |                           |
|---------------|---------------------------------------------------------|---------------------|---------------------------|
| Analysis Name | D:\Data\chem. dep\liyanzhong\WZK-5-28_P1-D-6_01_31759.d | 3/2/2022 3:46:53 PM |                           |
| Method        | Tune_pos_low_LC with calibration_2min_20210510.m        | Operator            | ECNU-Chem                 |
| Sample Name   | WZK-5-28                                                | Instrument          | maXis impact 282001.00122 |
| Comment       |                                                         |                     |                           |

| Acquisition Parameter |          |                       |           |                  |               |
|-----------------------|----------|-----------------------|-----------|------------------|---------------|
| Source Type           | ESI      | Ion Polarity          | Positive  | Set Nebulizer    | 1.5 Bar       |
| Focus                 | Active   | Set Capillary         | 4500 V    | Set Dry Heater   | $180^\circ C$ |
| Scan Begin            | 50 m/z   | Set End Plate Offset  | -500 V    | Set Dry Gas      | 6.0 l/min     |
| Scan End              | 1350 m/z | Set Collision Cell RF | 700.0 Vpp | Set Divert Valve | Waste         |

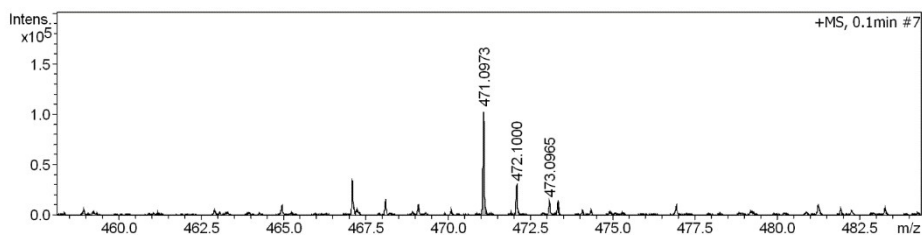

| # | m/z      | Res.  | S/N   | I      | I%    | FWHM   |
|---|----------|-------|-------|--------|-------|--------|
| 1 | 471.0973 | 14156 | 101.1 | 102424 | 100.0 | 0.0333 |
| 2 | 472.1000 | 13706 | 28.5  | 28920  | 28.2  | 0.0344 |
| 3 | 473.0965 | 10946 | 13.1  | 13332  | 13.0  | 0.0432 |

| Meas. m/z | # | Ion Formula                                                     | m/z      | err [ppm] | mSigma | Score | rdb    | e <sup>-</sup> Conf | N-Rule  |
|-----------|---|-----------------------------------------------------------------|----------|-----------|--------|-------|--------|---------------------|---------|
| 471.0973  | 1 | C <sub>28</sub> H <sub>20</sub> N <sub>2</sub> NaS <sub>2</sub> | 471.0960 | -2.7      | 22.1   | 3     | 100.00 | 19.5                | even ok |

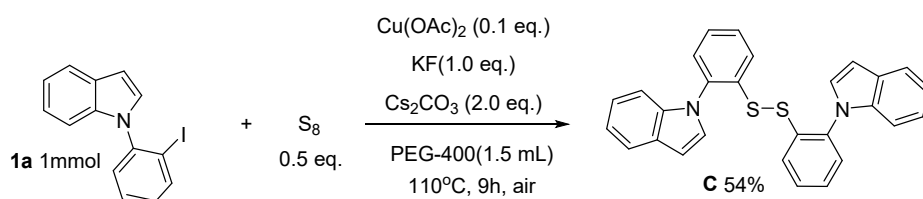



In a sealed tube, indole iodobenzenes **1a** (1.0 mmol), S<sub>8</sub> (0.5 mmol, 128.3 mg), Cu(OAc)<sub>2</sub> (0.1 mmol, 20.0 mg), Cs<sub>2</sub>CO<sub>3</sub> (2.0 mmol, 651.6 mg), KF (1.0 mmol, 58.1 mg) and PEG-400 (1.5 mL) were stirred at 110 °C (oil bath) under air. After 8 hour of reaction, the reaction mixture was then quenched by water, and the water layers were extracted with ethyl acetate (15 mL × 3). The combined organic layers were washed with brine, dried over anhydrous Na<sub>2</sub>SO<sub>4</sub>. After removal of the EA, the residue was purified by chromatography on silica gel (PE~PE:EA=100:1) to afford **C** in 54%.

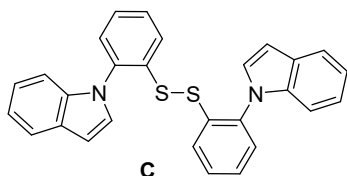

**1,2-bis(2-(1H-indol-1-yl)phenyl)disulfane (C)**. Yellow oil, purified by chromatography on silica gel (PE~PE:EA=100:1); yield: 54%, 120.8 mg. <sup>1</sup>H NMR (500 MHz, CDCl<sub>3</sub>) δ 7.72-7.68 (m, 2H), 7.56 (d, *J* = 7.5 Hz, 2H), 7.35-7.26 (m, 6H), 7.19-7.15 (m, 4H), 7.14-7.10 (m, 2H), 7.04-6.99 (m, 2H), 6.69 (d, *J* = 3.0 Hz, 2H). <sup>13</sup>C NMR (125 MHz, CDCl<sub>3</sub>) δ 137.18, 137.03, 135.18, 129.05, 128.89, 128.62, 128.47, 128.43, 127.77, 122.34, 120.99, 120.38, 110.46, 103.40. HRMS (ESI) *m/z*: [M+Na]<sup>+</sup> calcd for C<sub>28</sub>H<sub>20</sub>N<sub>2</sub>NaS<sub>2</sub> 471.0960, found 471.0973.

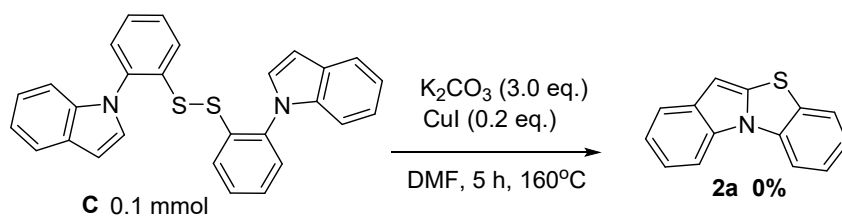

In a sealed tube, **C** (0.1 mmol, 44.9 mg), CuI (0.02 mmol, 3.8 mg), K<sub>2</sub>CO<sub>3</sub> (0.3 mmol, 41.5 mg) and DMF (2.0 mL) were stirred at 160 °C (oil bath) under air. After 1 hour of reaction, the reaction mixture was then quenched by water.

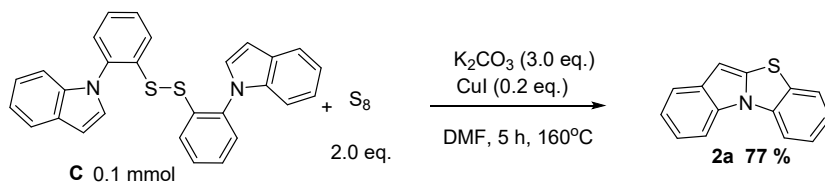

In a sealed tube, **C** (0.1 mmol, 44.9 mg), CuI (0.02 mmol, 3.8 mg), K<sub>2</sub>CO<sub>3</sub> (0.3 mmol, 41.5 mg) and DMF (2.0 mL) were stirred at 160 °C (oil bath) under air. After 5 hours of reaction, the reaction mixture was then quenched by water, and the water layers were extracted with ethyl acetate (15 mL × 3). The combined organic layers were

washed with brine, dried over anhydrous  $\text{Na}_2\text{SO}_4$ . After removal of the EA, the residue was purified by chromatography on silica gel (PE) to afford **2a** in 77% yield.

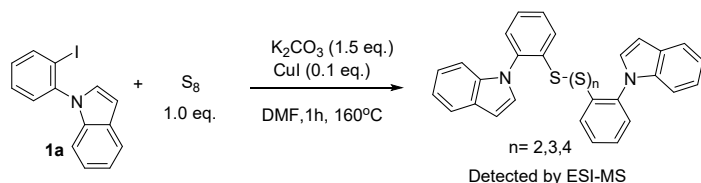

In a sealed tube, indole iodobenzenes **1a** (0.4 mmol),  $\text{S}_8$  (0.4 mmol, 102.6 mg),  $\text{CuI}$  (0.04 mmol, 7.6 mg),  $\text{K}_2\text{CO}_3$  (0.6 mmol, 82.9 mg) and DMF (4.0 mL) were stirred at 160 °C (oil bath) under air. After 1 hour of reaction, the reaction mixture was then quenched by water, and the water layers were extracted with ethyl acetate (15 mL  $\times$  3). The combined organic layers were washed with brine, dried over anhydrous  $\text{Na}_2\text{SO}_4$ . After removal of the EA, a sample was extracted from the reaction mixture for ESI-MS analysis.

### ESI-MS analysis result of trisulfide.

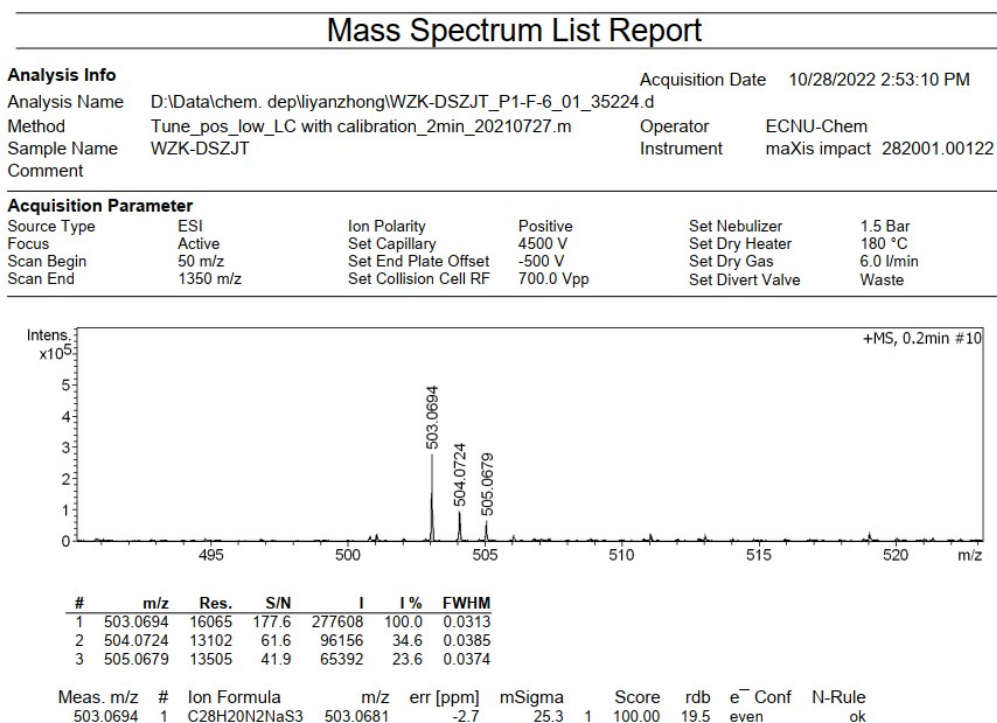

## ESI-MS analysis result of tetrasulfide.

### Mass Spectrum List Report

|                      |                                                          |                  |                           |
|----------------------|----------------------------------------------------------|------------------|---------------------------|
| <b>Analysis Info</b> |                                                          | Acquisition Date | 10/28/2022 2:53:10 PM     |
| Analysis Name        | D:\Data\chem. dep\liyanzhong\WZK-DSZJT_P1-F-6_01_35224.d | Operator         | ECNU-Chem                 |
| Method               | Tune_pos_low_LC with calibration_2min_20210727.m         | Instrument       | maXis impact 282001.00122 |
| Sample Name          | WZK-DSZJT                                                |                  |                           |
| Comment              |                                                          |                  |                           |

|                              |          |                       |           |                  |           |
|------------------------------|----------|-----------------------|-----------|------------------|-----------|
| <b>Acquisition Parameter</b> |          |                       |           |                  |           |
| Source Type                  | ESI      | Ion Polarity          | Positive  | Set Nebulizer    | 1.5 Bar   |
| Focus                        | Active   | Set Capillary         | 4500 V    | Set Dry Heater   | 180 °C    |
| Scan Begin                   | 50 m/z   | Set End Plate Offset  | -500 V    | Set Dry Gas      | 6.0 l/min |
| Scan End                     | 1350 m/z | Set Collision Cell RF | 700.0 Vpp | Set Divert Valve | Waste     |

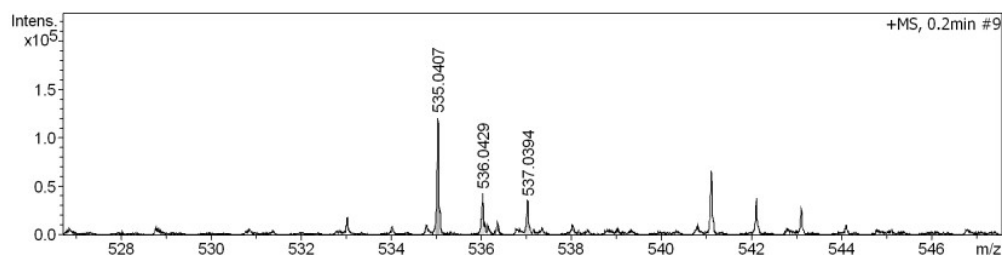

| # | m/z      | Res.  | S/N  | I      | I%    | FWHM   |
|---|----------|-------|------|--------|-------|--------|
| 1 | 535.0407 | 13801 | 80.8 | 120804 | 100.0 | 0.0388 |
| 2 | 536.0429 | 13402 | 28.4 | 42336  | 35.0  | 0.0400 |
| 3 | 537.0394 | 11327 | 23.7 | 35236  | 29.2  | 0.0474 |

|           |   |              |          |           |        |       |        |                     |            |
|-----------|---|--------------|----------|-----------|--------|-------|--------|---------------------|------------|
| Meas. m/z | # | Ion Formula  | m/z      | err [ppm] | mSigma | Score | rdb    | e <sup>-</sup> Conf | N-Rule     |
| 535.0407  | 1 | C28H20N2NaS4 | 535.0402 | -1.0      | 27.8   | 1     | 100.00 | 19.5                | even<br>ok |

## ESI-MS analysis result of pentasulfide.

## Mass Spectrum List Report

**Analysis Info**  
Analysis Name D:\Data\chem. dep\liyanzhong\WZK-DSZJT\_P1-F-6\_01\_35224.d Acquisition Date 10/28/2022 2:53:10 PM  
Method Tune\_pos\_low\_LC with calibration\_2min\_20210727.m Operator ECNU-Chem  
Sample Name WZK-DSZJT Instrument maXis impact 282001.00122  
Comment

**Acquisition Parameter**  
Source Type ESI Ion Polarity Positive Set Nebulizer 1.5 Bar  
Focus Active Set Capillary 4500 V Set Dry Heater 180 °C  
Scan Begin 50 m/z Set End Plate Offset -500 V Set Dry Gas 6.0 l/min  
Scan End 1350 m/z Set Collision Cell RF 700.0 Vpp Set Divert Valve Waste

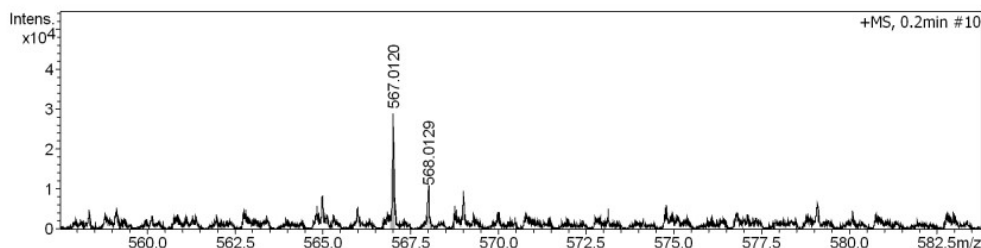

| # | m/z      | Res.  | S/N  | I     | I %   | FWHM   |
|---|----------|-------|------|-------|-------|--------|
| 1 | 567.0120 | 14036 | 21.6 | 28812 | 100.0 | 0.0404 |
| 2 | 568.0129 | 12267 | 7.3  | 9752  | 33.8  | 0.0463 |

| Meas. m/z | # | Ion Formula  | m/z      | err [ppm] | mSigma | Score | rdb    | e <sup>-</sup> Conf | N-Rule  |
|-----------|---|--------------|----------|-----------|--------|-------|--------|---------------------|---------|
| 567.0120  | 1 | C28H20N2NaS5 | 567.0122 | 0.5       | 35.1   | 1     | 100.00 | 19.5                | even ok |

## 8. References

1. a) M. J. Sun, X. Y. Chen, Z. C. Feng, G. B. Deng, Y. Yang, Y. Liang, *Org. Chem. Front.*, **2021**, *8*, 6535; b) M. Elsherbini, W. J. Moran, *Org. Biomol. Chem.*, **2021**, *19*, 4706; c) R. X. Liu, Q. Wang, Y. Wei, M. Shi, *Chem. Commun.*, **2018**, *54*, 1225; d) H. H. Liu, T. T. Duan, Z. Y. Zhang, C. X. Xie, C. Ma, *Org. Lett.* **2015**, *17*, 2932; e) K. Naveen, S. A. Nikson, P. T. Perumal, *Adv. Synth. Catal.* **2017**, *359*, 2407; f) A. K. Verma, J. Singh, R. C. Larock, *Tetrahedron*. **2009**, *65*, 8434
2. T. F. Yao, T. Xia, W. Yan, H. F. Xu, F. Zhang, Y. J. Xiao, J. L. Zhang, L. Liu, *Org. Lett.* **2020**, *22*, 4511.
3. U. K. Bandarage, C. M. Bligh, D. Boucher, M. J. Boyd, M. A. Brodney, M. P. Clark, V. Damagnez, L. T. D. Fanning, R. F. Fimognari, G. S. Fleming, CN 114096542.
4. C. T. Feng, Y. Peng, G. R. Ding, X. X. Li, C. Cui and Y. Z. Yan, *Chem. Commun.* **2018**, *54*, 13367

## 9. Copies of spectra of products.

$^1\text{H}$  NMR (500 MHz,  $\text{CDCl}_3$ )

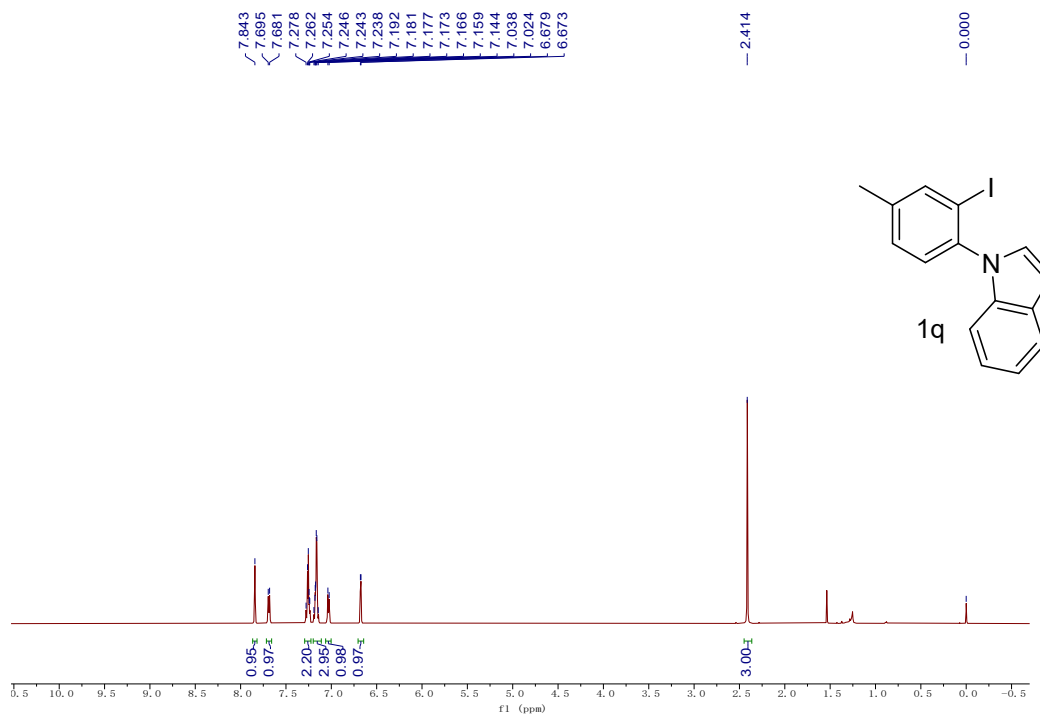

$^{13}\text{C}$  NMR (125 MHz,  $\text{CDCl}_3$ )

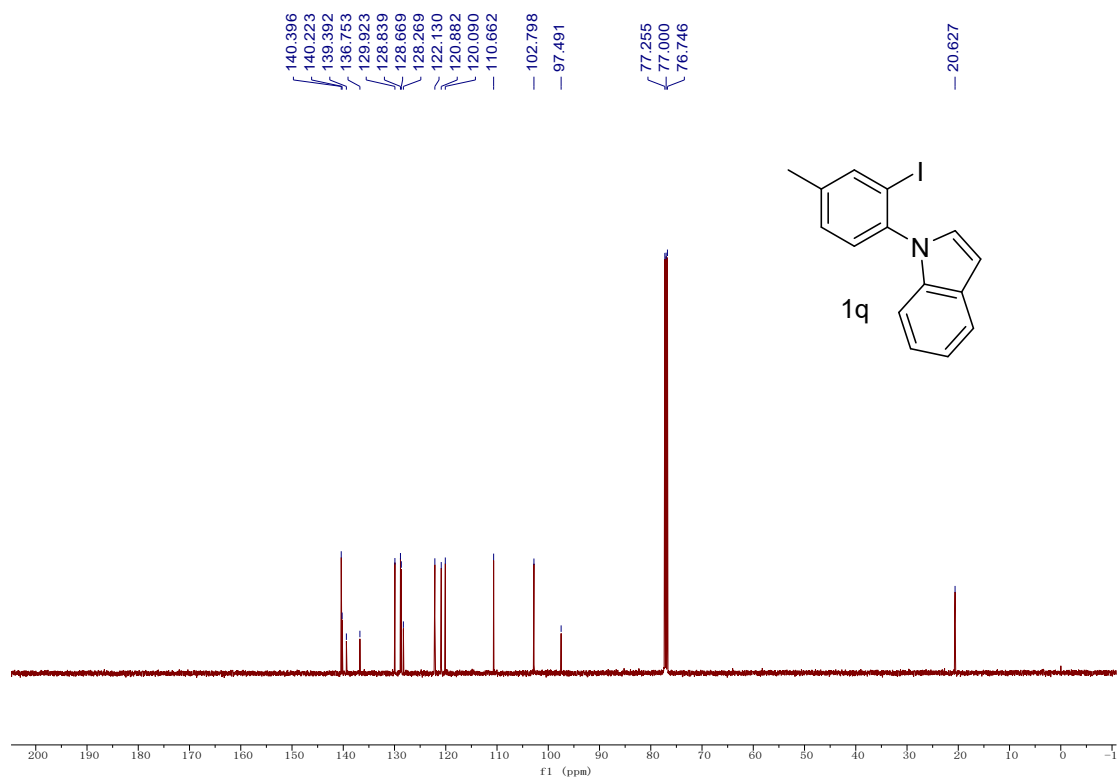

**<sup>1</sup>H NMR (500 MHz, CDCl<sub>3</sub>)**

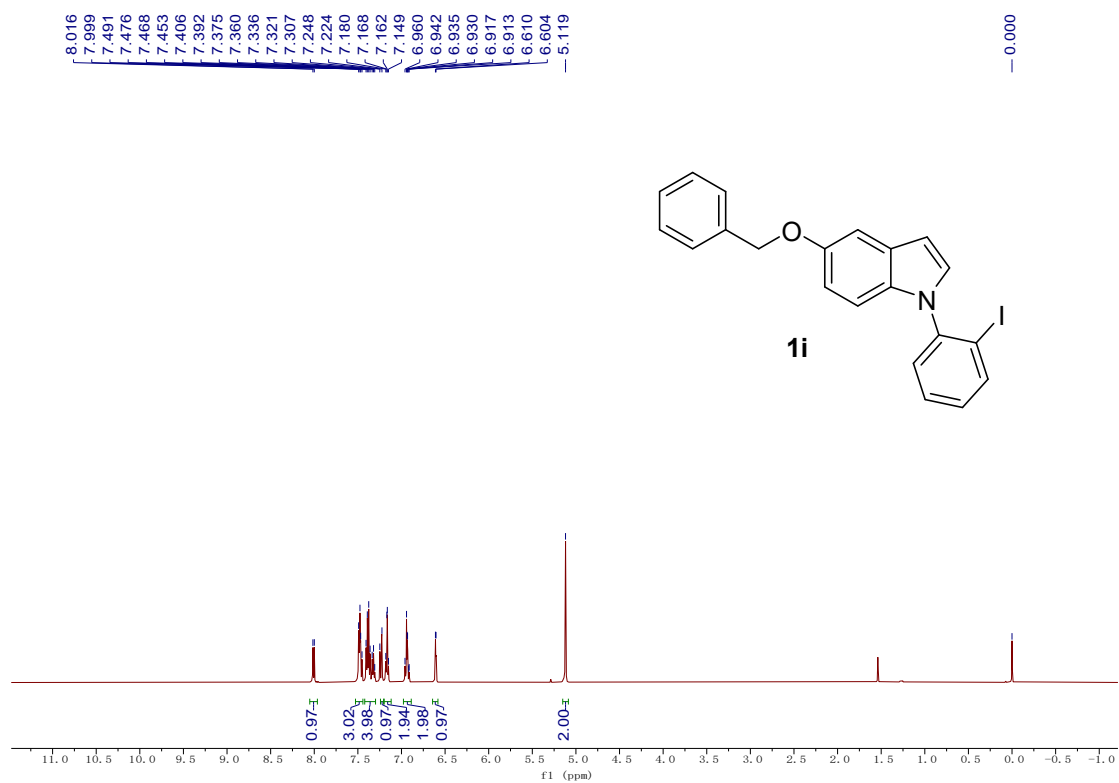

**<sup>13</sup>C NMR (125 MHz, CDCl<sub>3</sub>)**

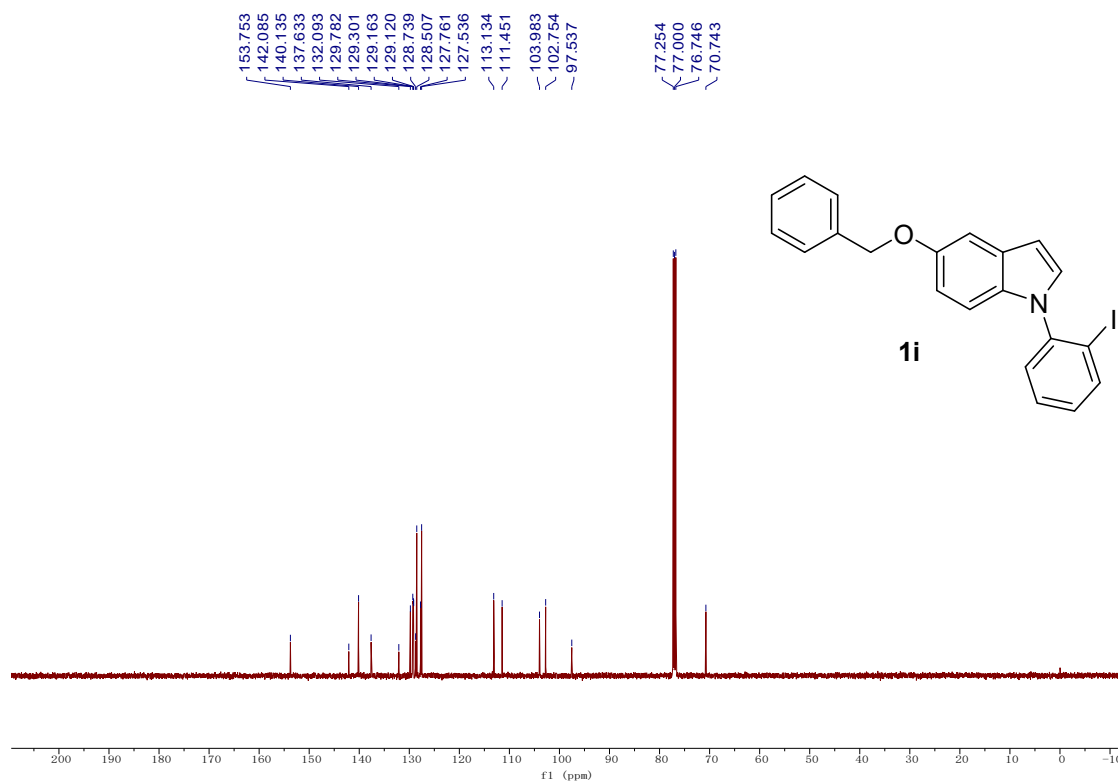

**<sup>1</sup>H NMR (600 MHz, CDCl<sub>3</sub>)**

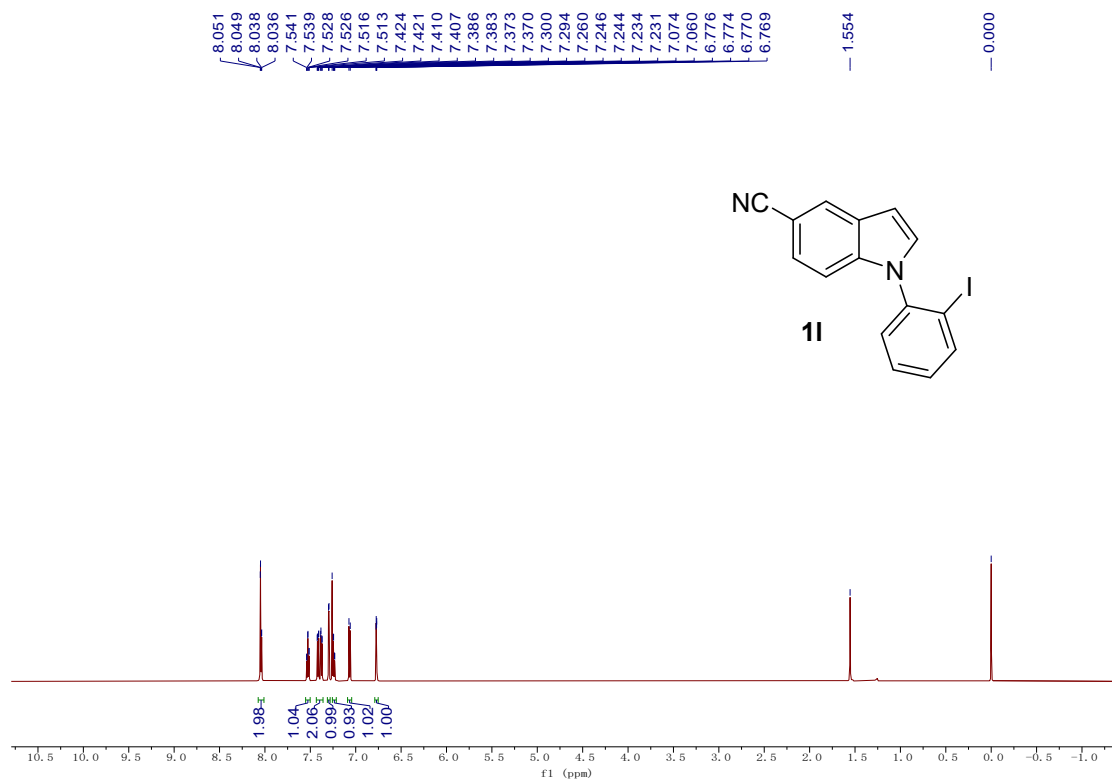

**<sup>13</sup>C NMR (150 MHz, CDCl<sub>3</sub>)**

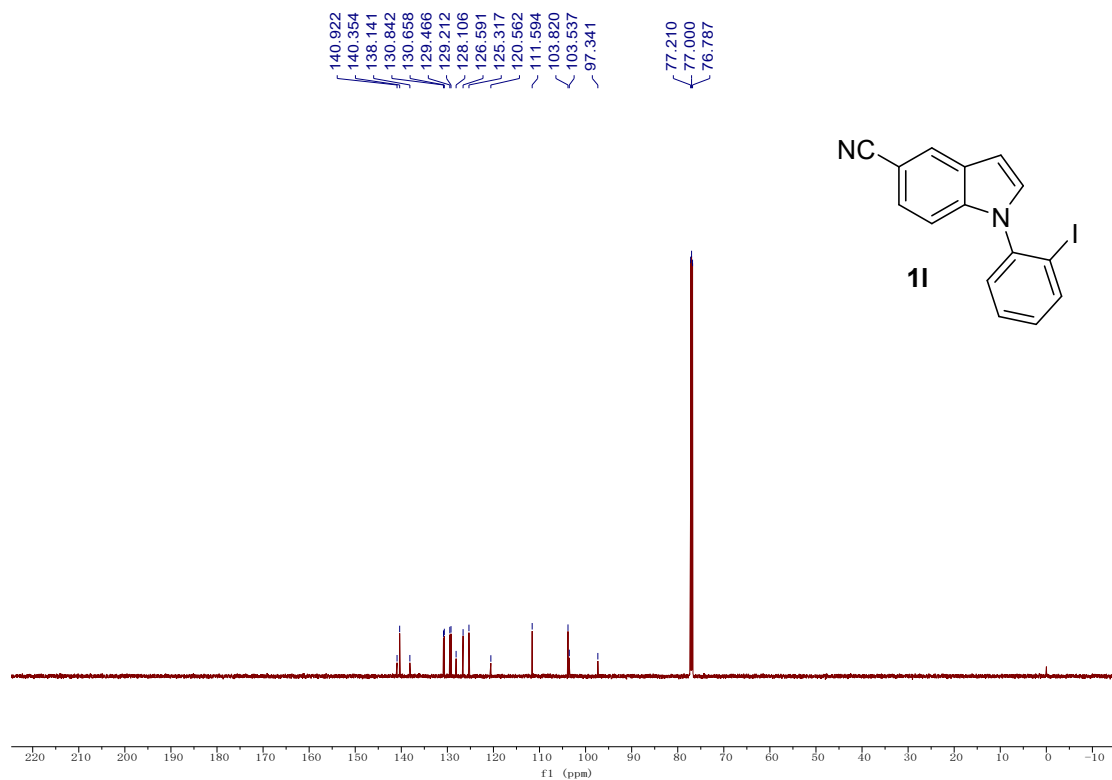

<sup>1</sup>H NMR (500 MHz, CDCl<sub>3</sub>)

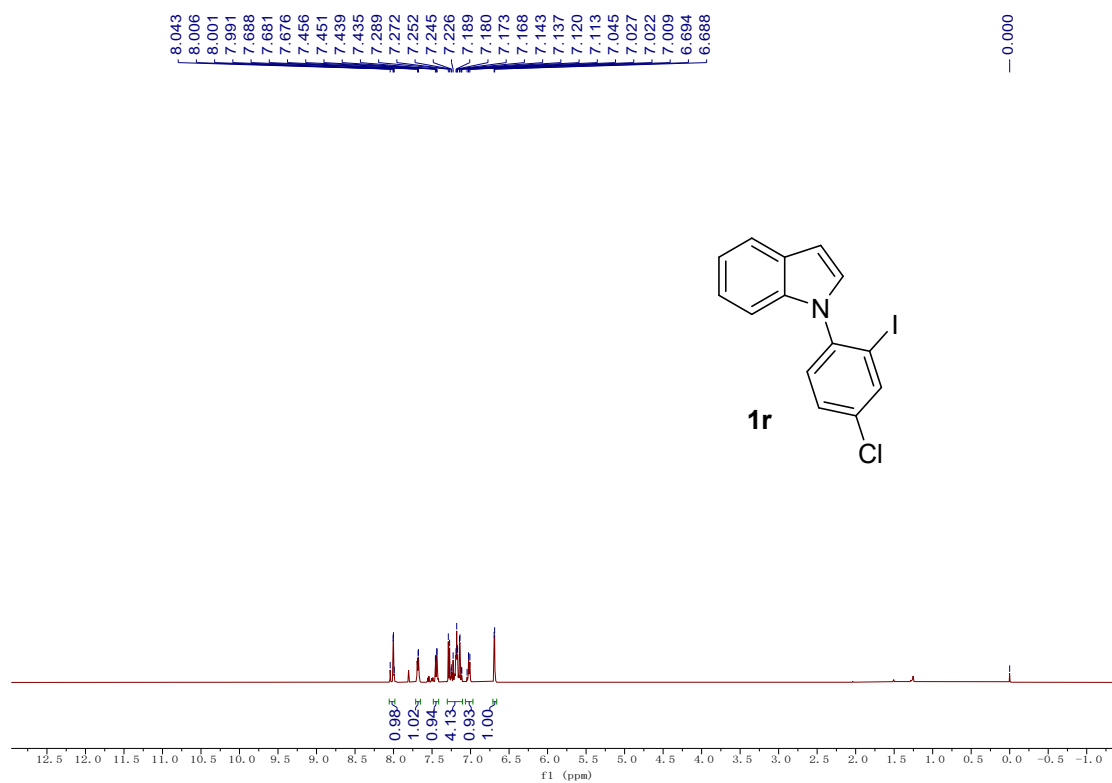



$^{13}\text{C}$  NMR (125 MHz,  $\text{CDCl}_3$ )

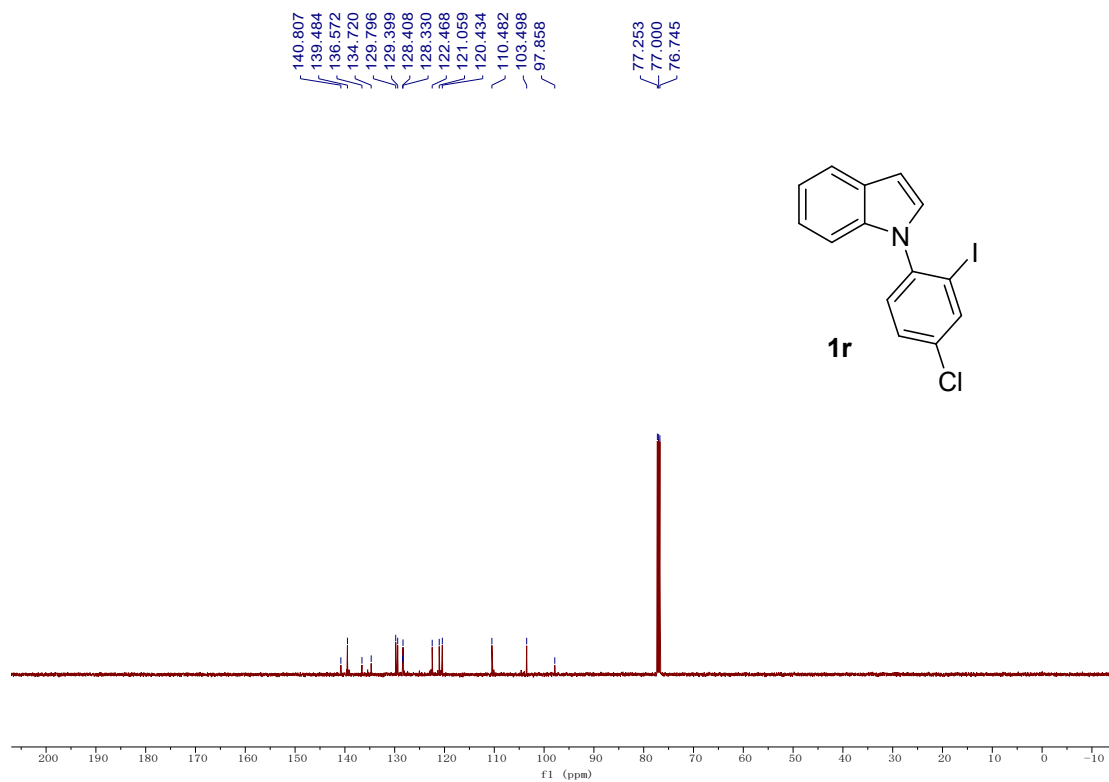

$^1\text{H}$  NMR (500 MHz,  $\text{CDCl}_3$ )

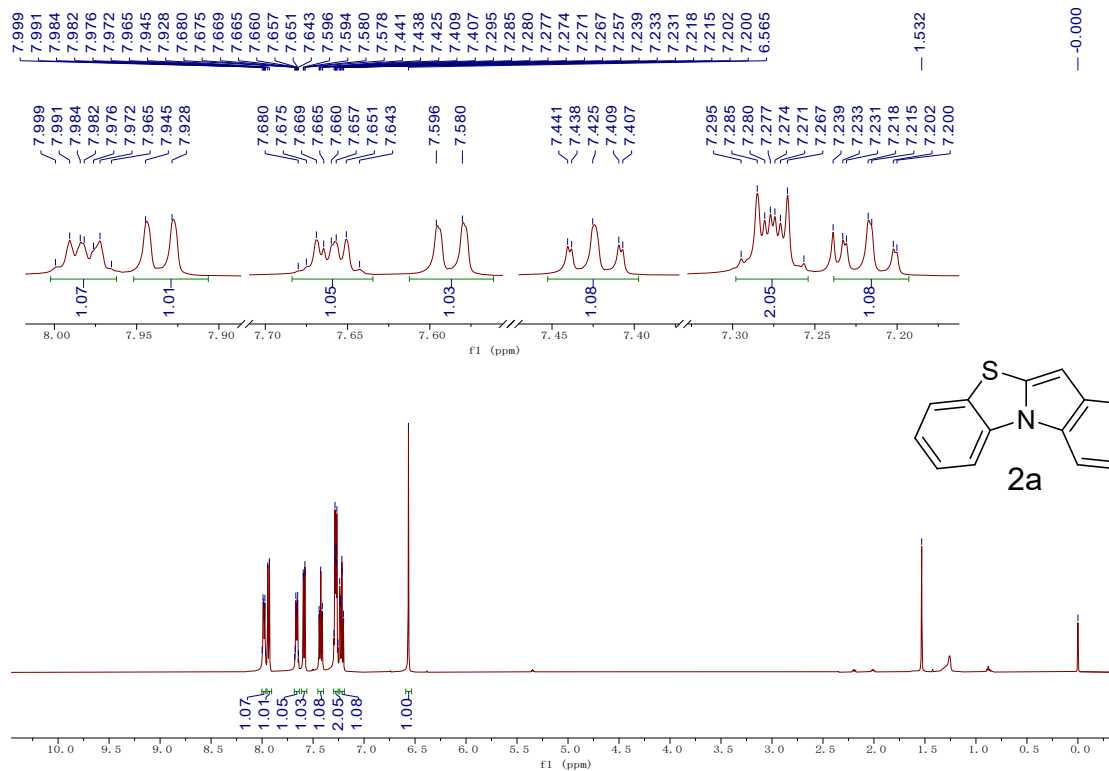

$^{13}\text{C}$  NMR (125 MHz,  $\text{CDCl}_3$ )

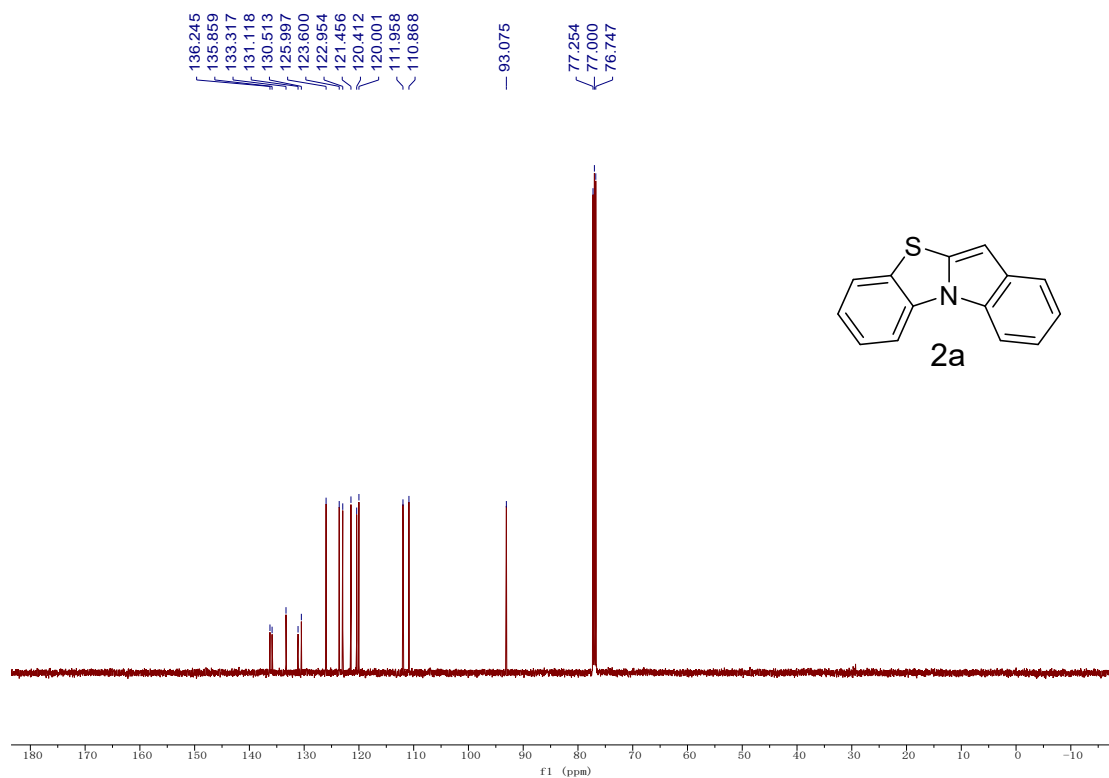

<sup>1</sup>H NMR (500 MHz, CDCl<sub>3</sub>)

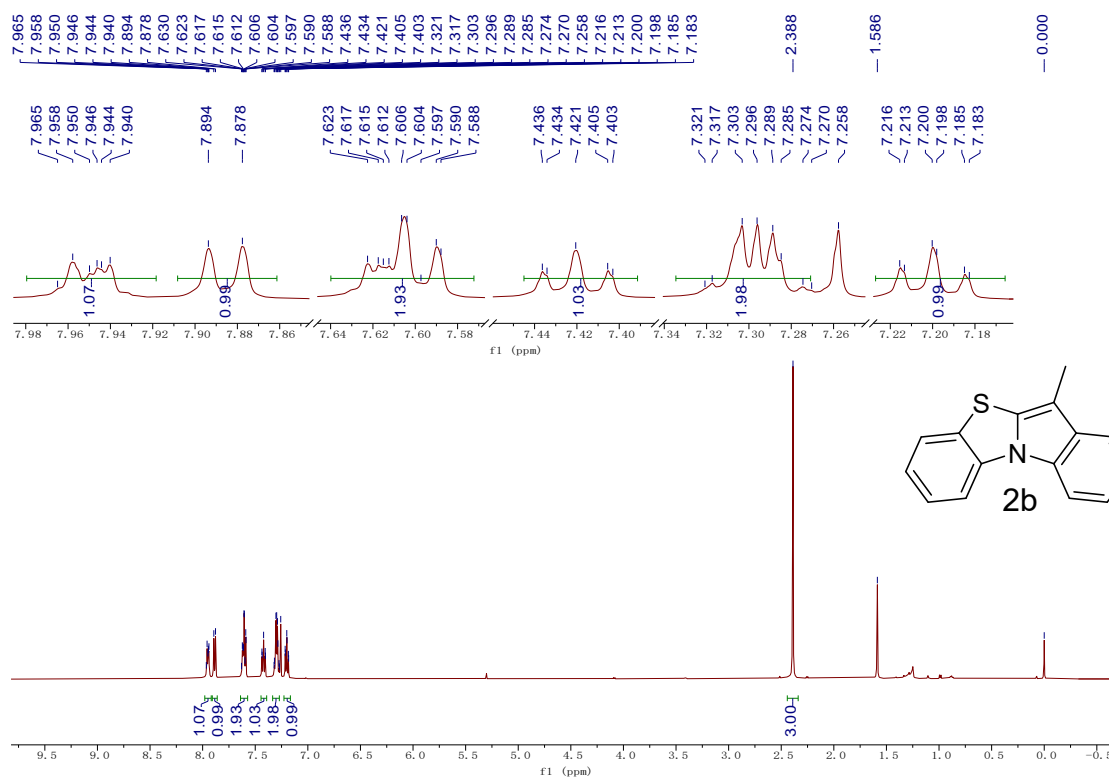

<sup>13</sup>C NMR (125 MHz, CDCl<sub>3</sub>)

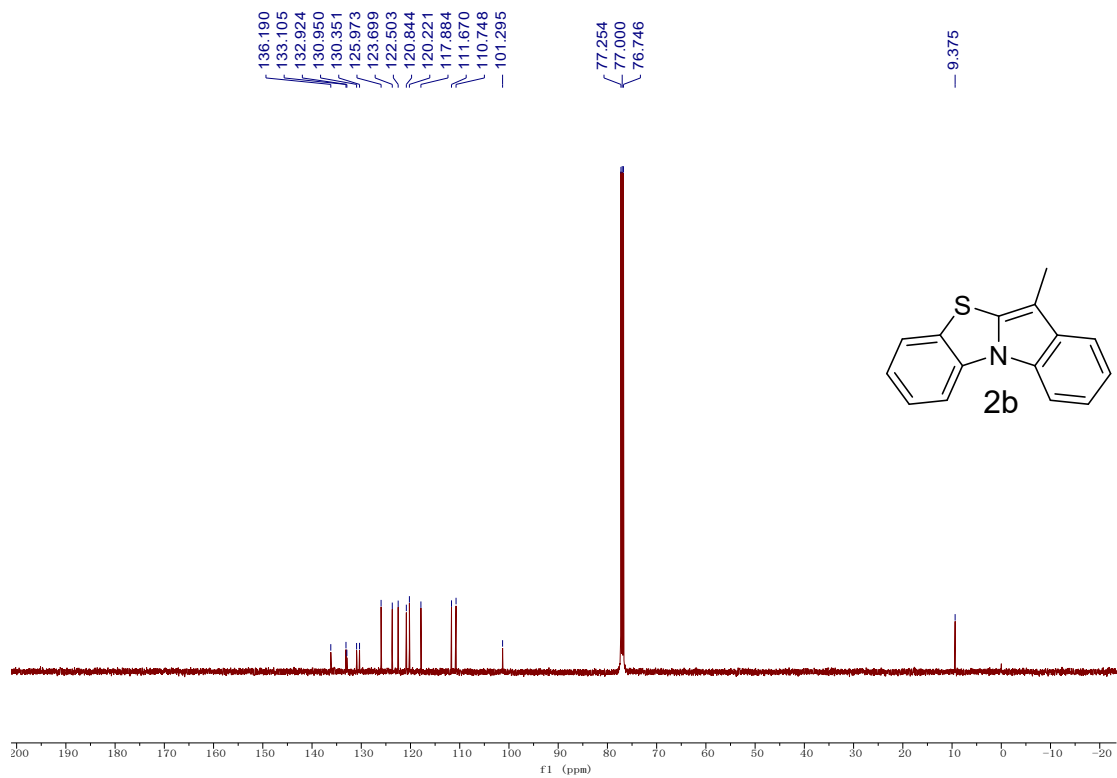

**<sup>1</sup>H NMR (500 MHz, CDCl<sub>3</sub>)**

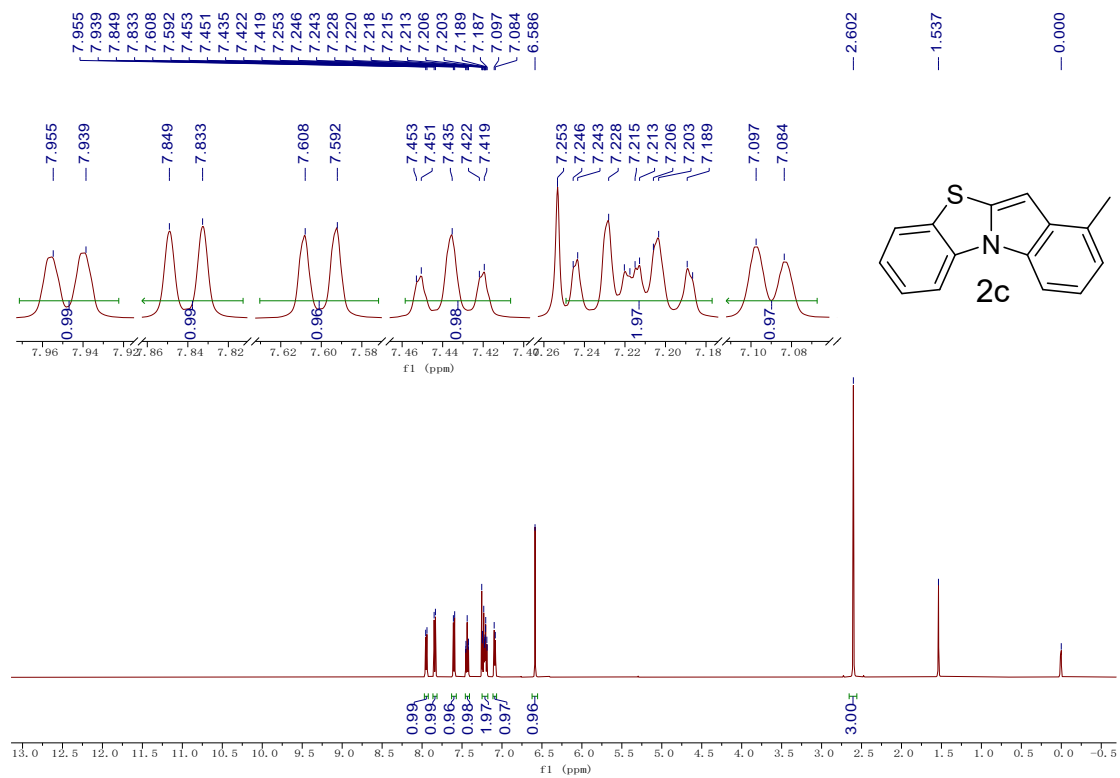

**<sup>13</sup>C NMR (125 MHz, CDCl<sub>3</sub>)**

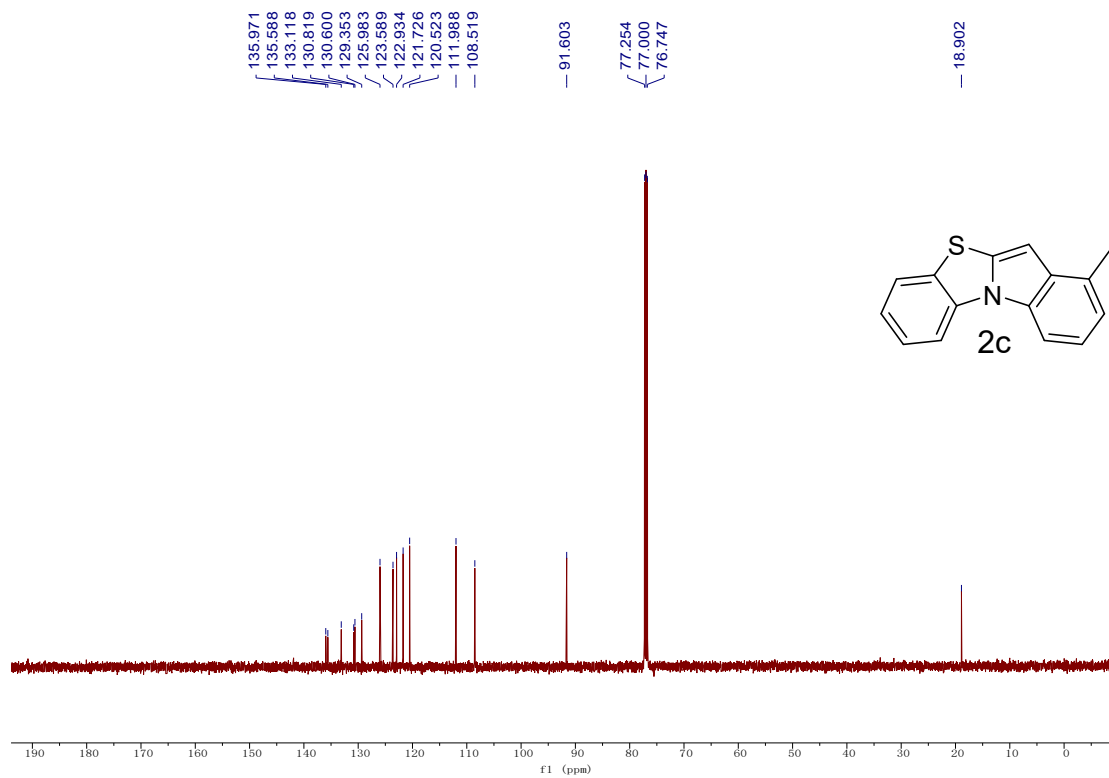

<sup>1</sup>H NMR (500 MHz, CDCl<sub>3</sub>)

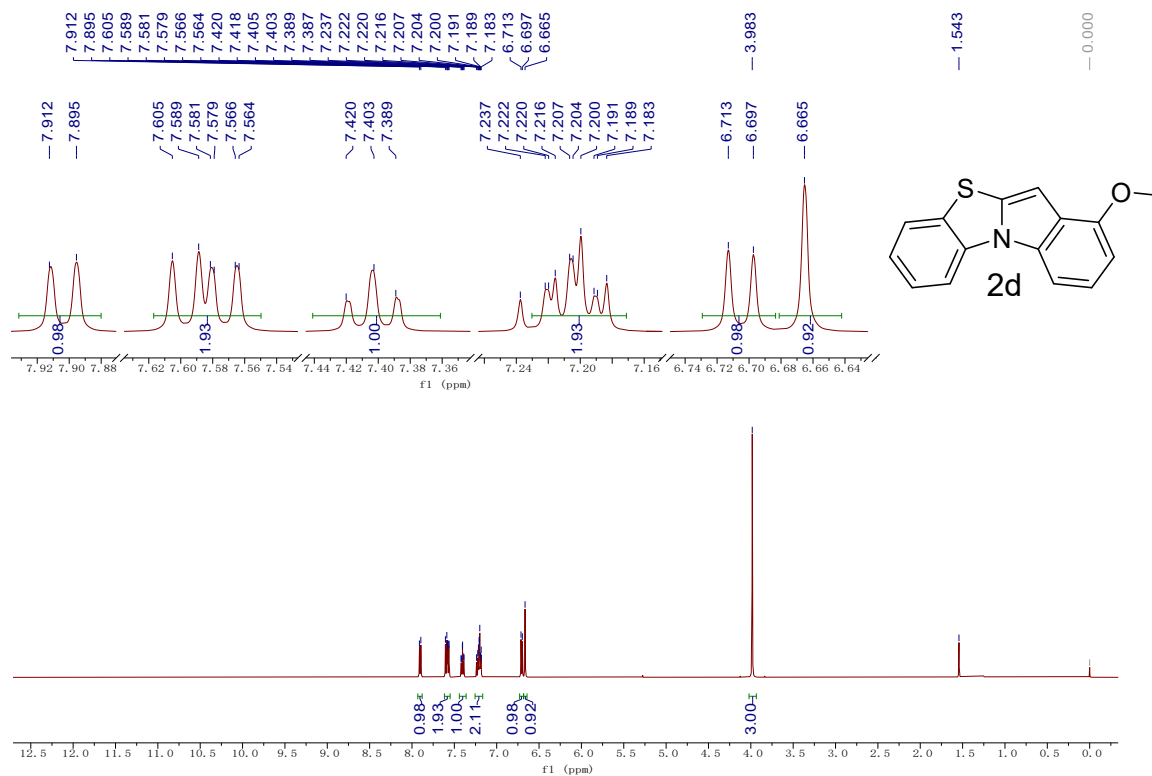

<sup>13</sup>C NMR (125 MHz, CDCl<sub>3</sub>)

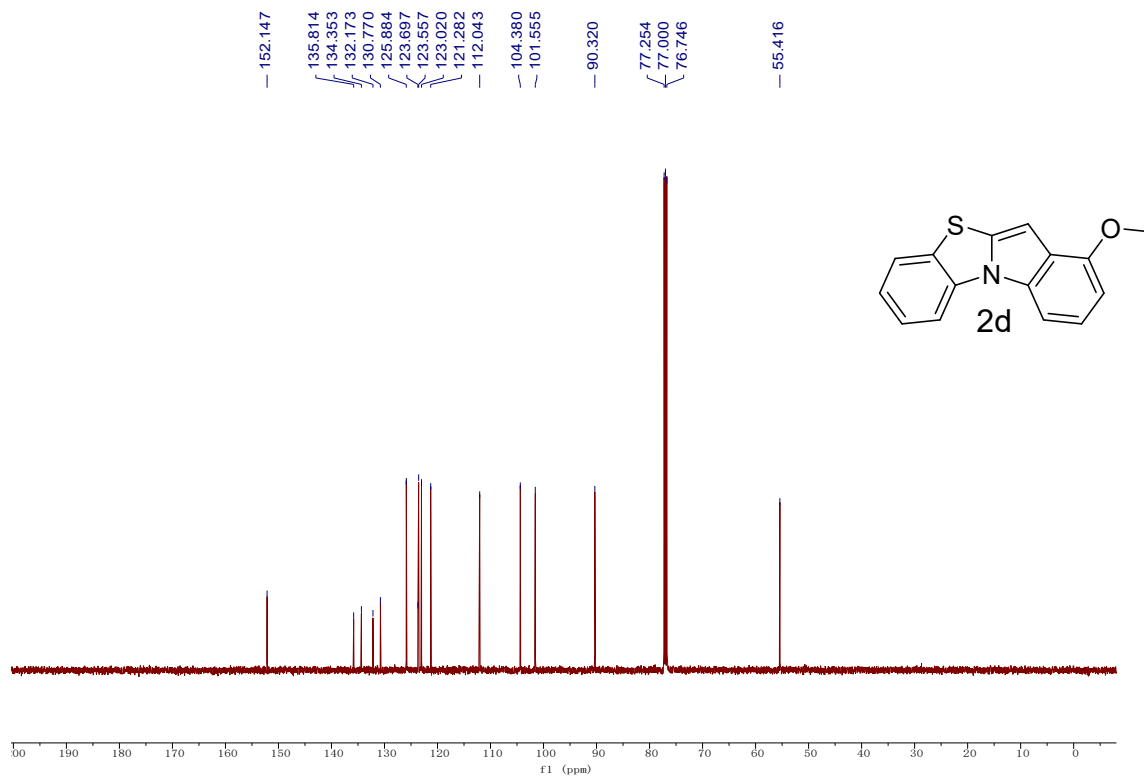

<sup>1</sup>H NMR (500 MHz, CDCl<sub>3</sub>)

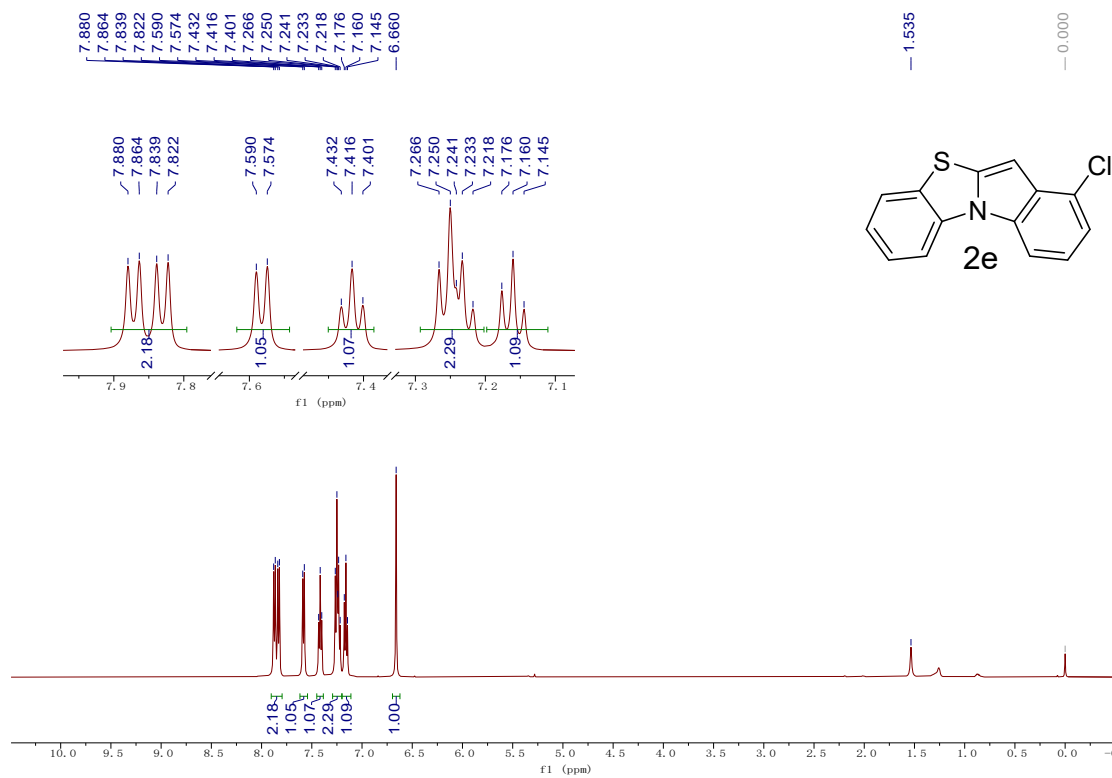

<sup>13</sup>C NMR (125 MHz, CDCl<sub>3</sub>)

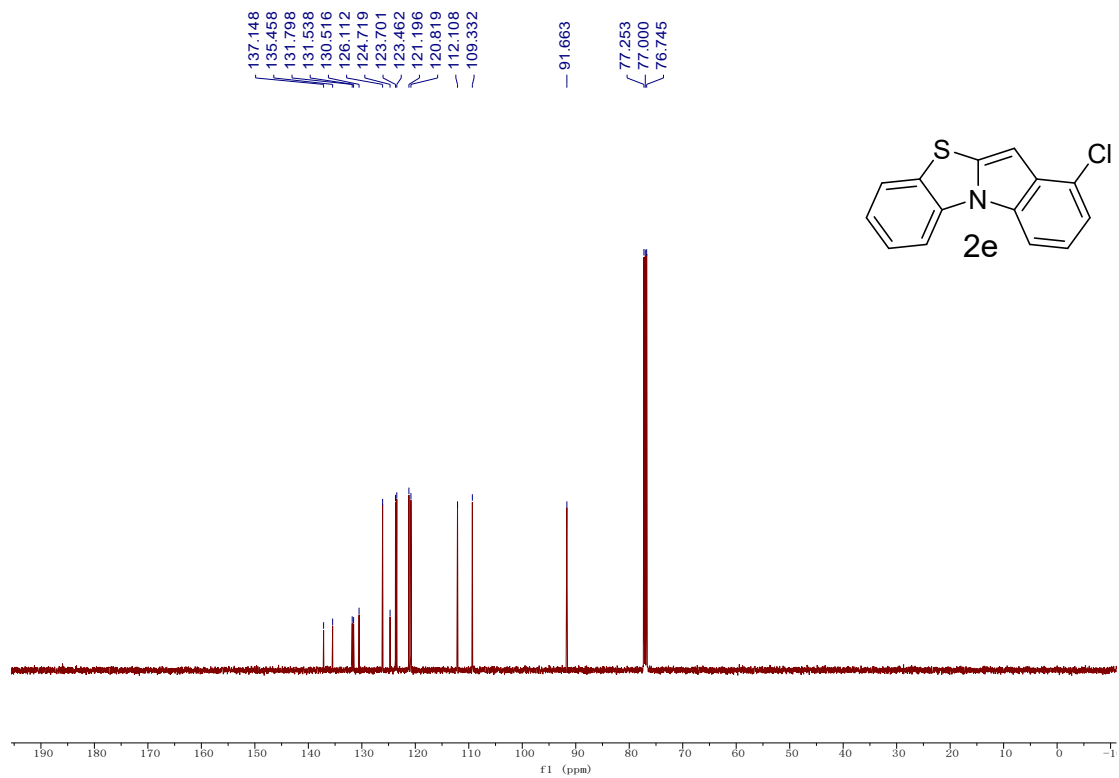

<sup>1</sup>H NMR (500 MHz, CDCl<sub>3</sub>)

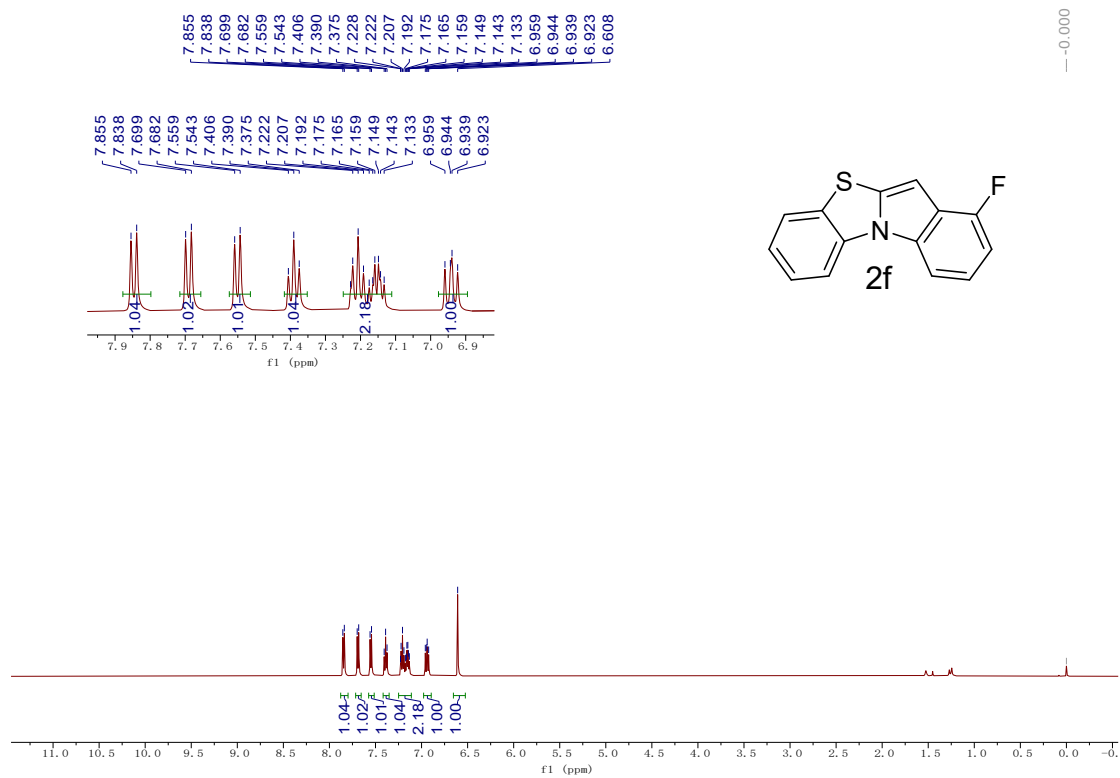

<sup>13</sup>C NMR (125 MHz, CDCl<sub>3</sub>)

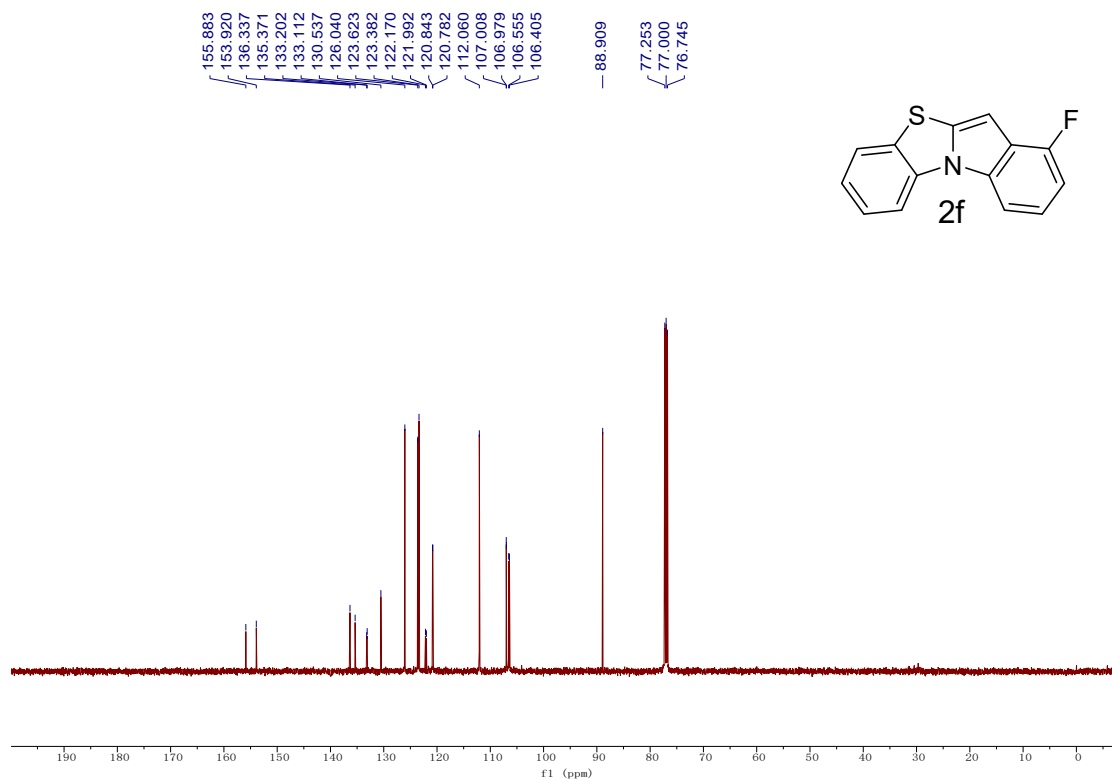

<sup>1</sup>H NMR (500 MHz, CDCl<sub>3</sub>)

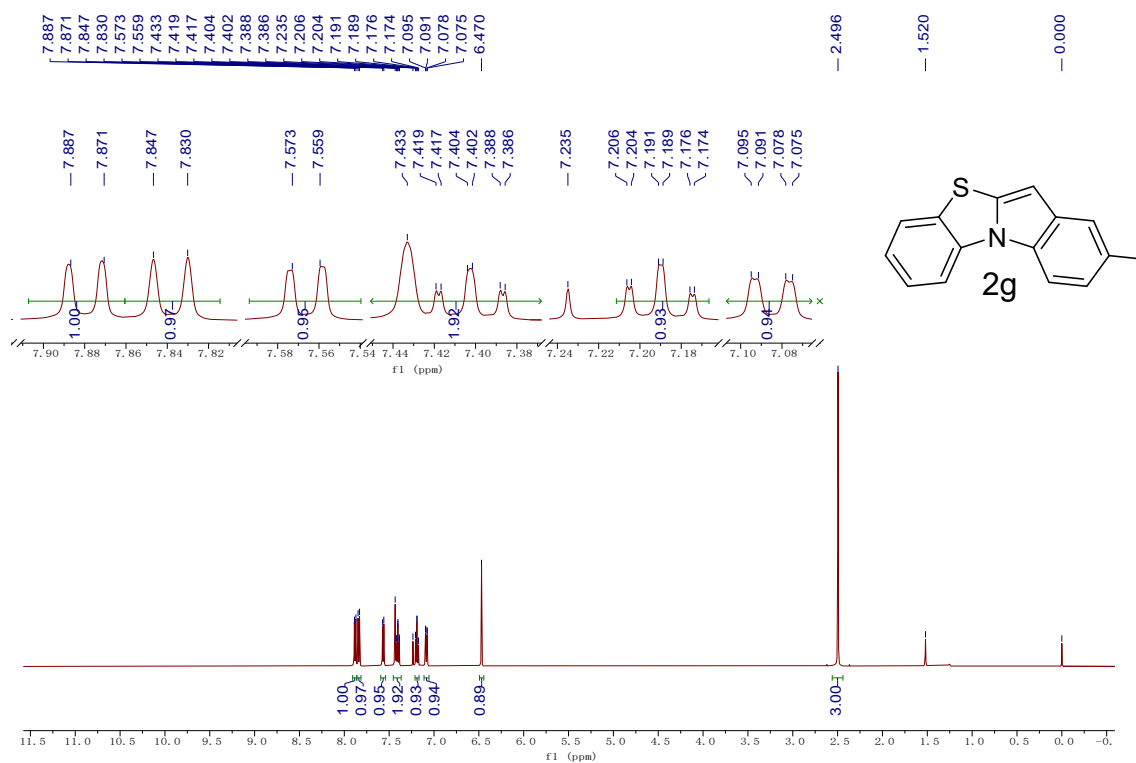

<sup>13</sup>C NMR (125 MHz, CDCl<sub>3</sub>)

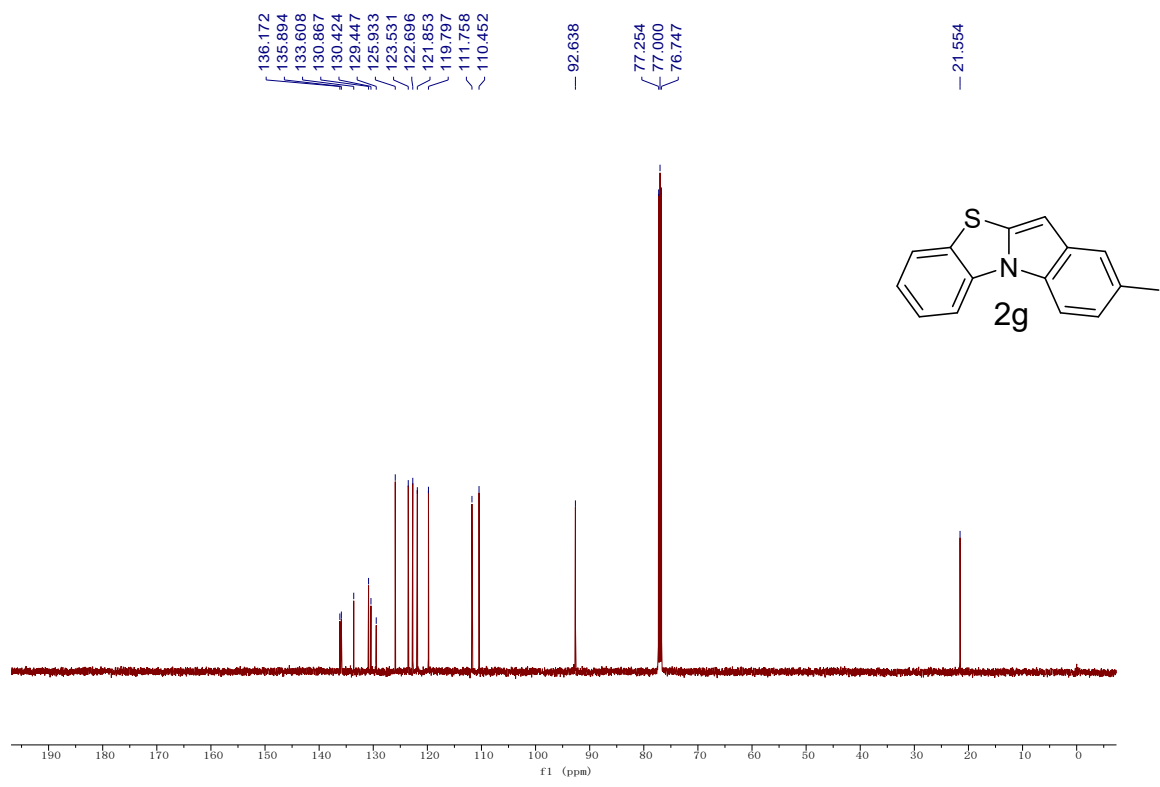

<sup>1</sup>H NMR (500 MHz, CDCl<sub>3</sub>)

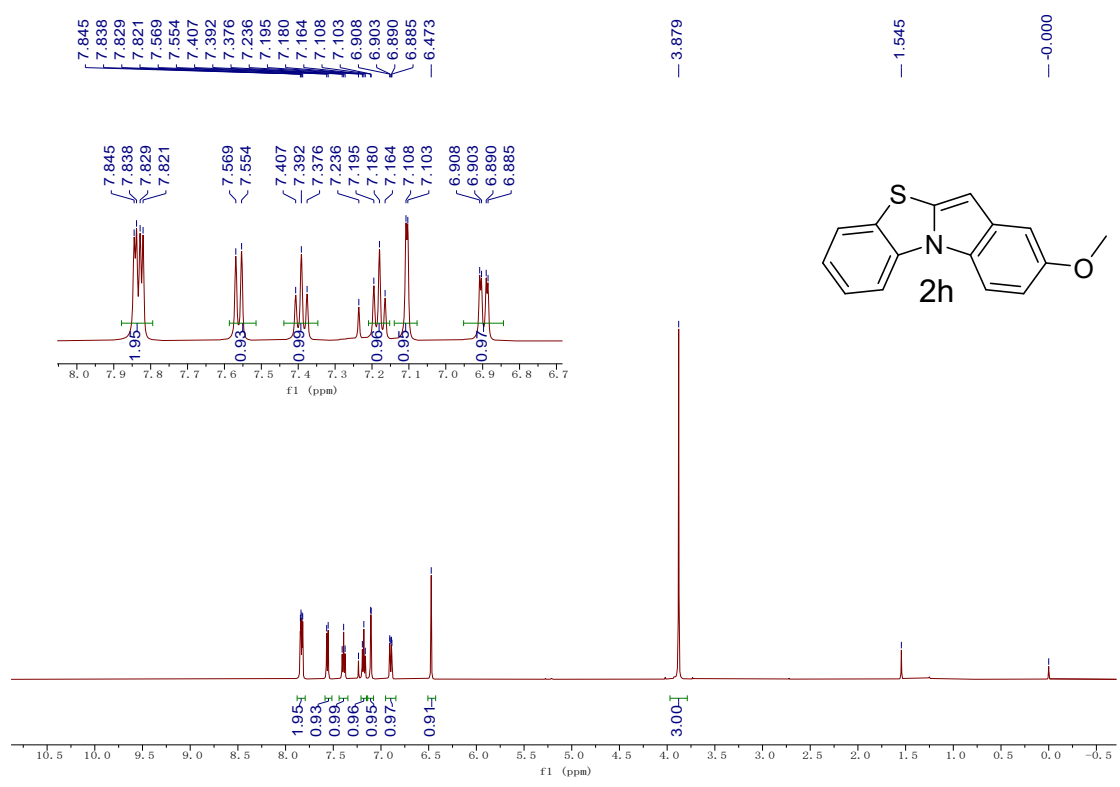

<sup>13</sup>C NMR (125 MHz, CDCl<sub>3</sub>)



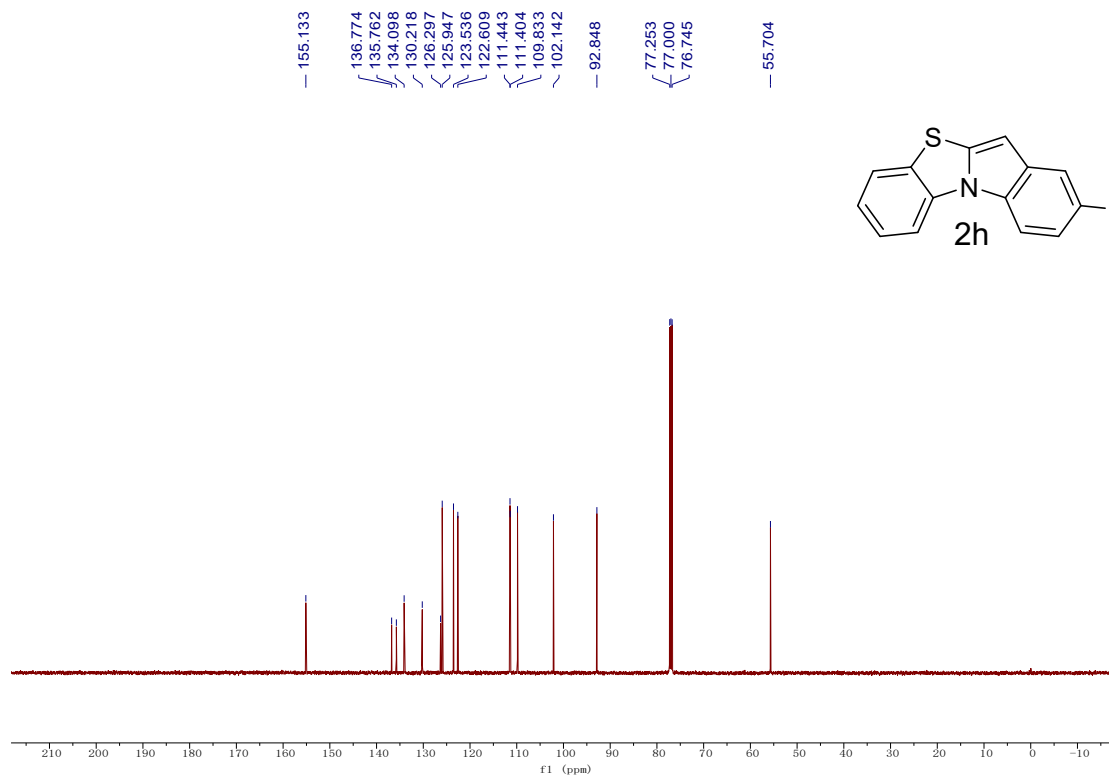

<sup>1</sup>H NMR (500 MHz, CDCl<sub>3</sub>)

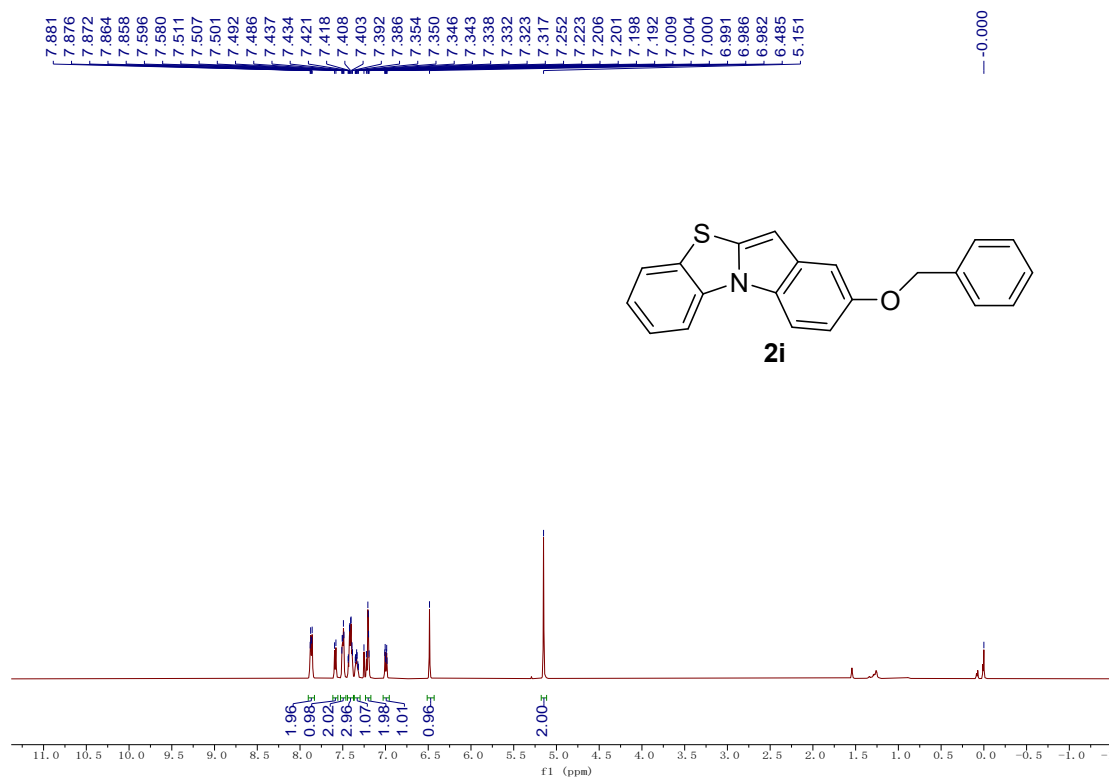

<sup>13</sup>C NMR (125 MHz, CDCl<sub>3</sub>)

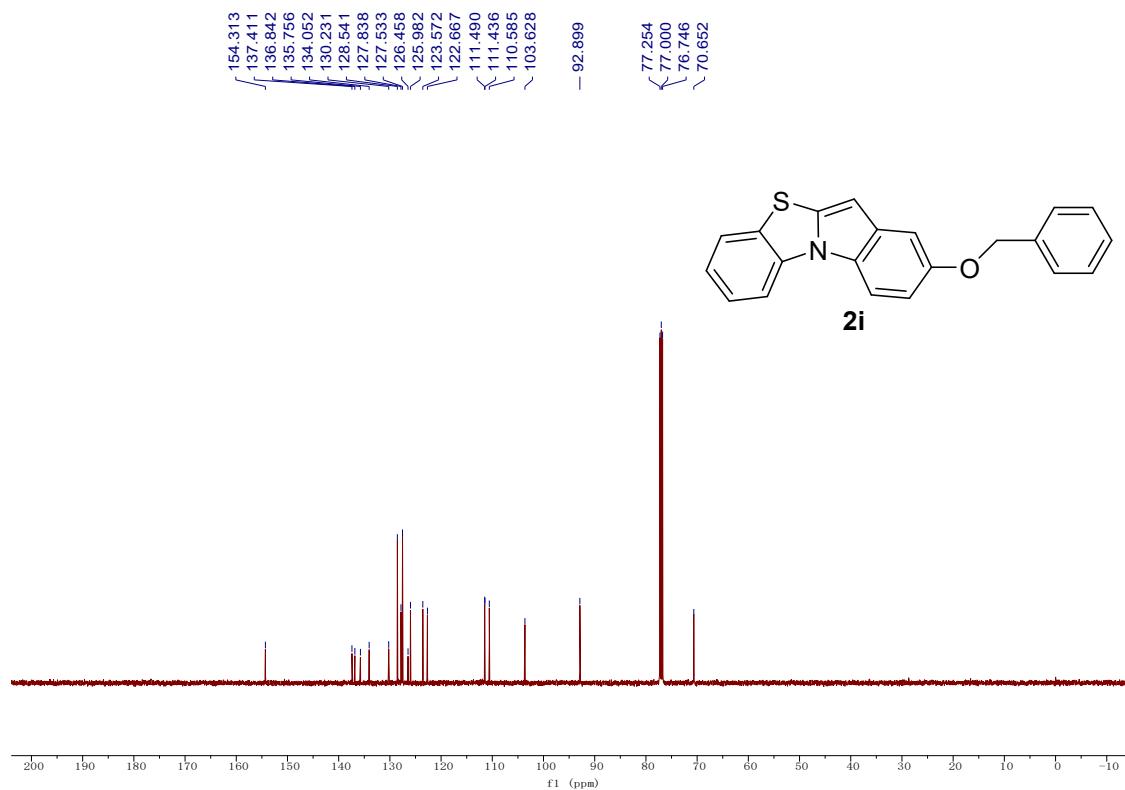

<sup>1</sup>H NMR (500 MHz, CDCl<sub>3</sub>)

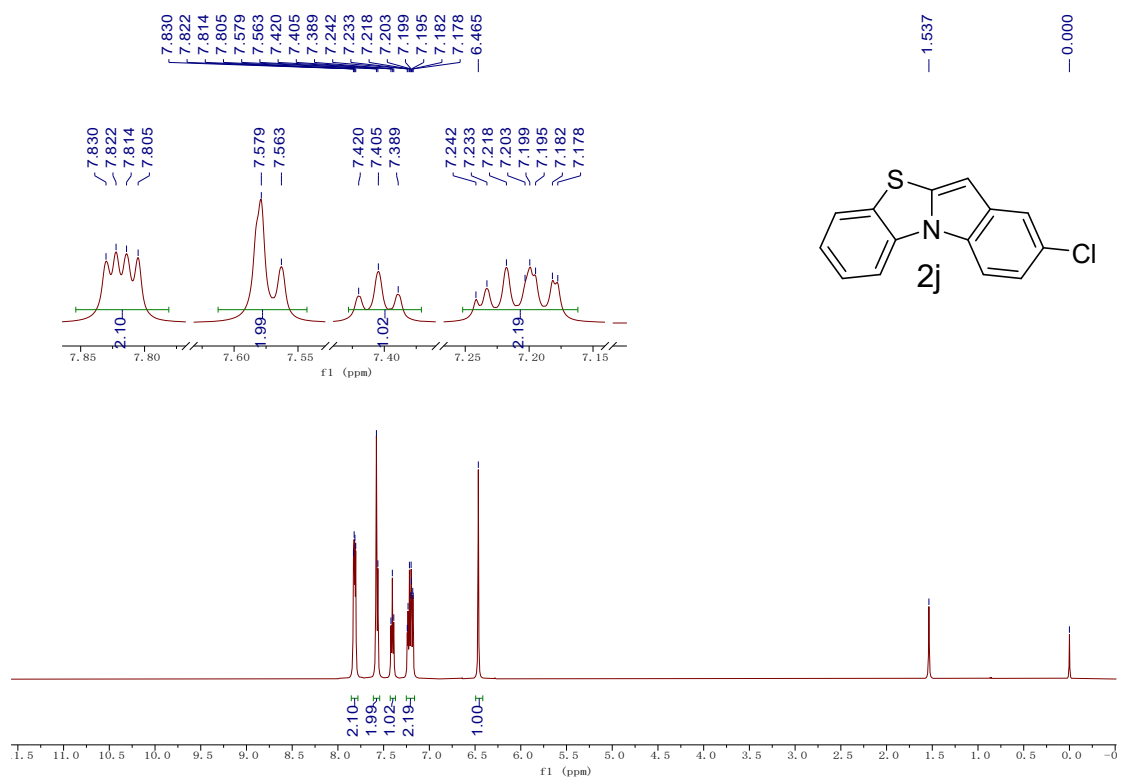

<sup>13</sup>C NMR (125 MHz, CDCl<sub>3</sub>)

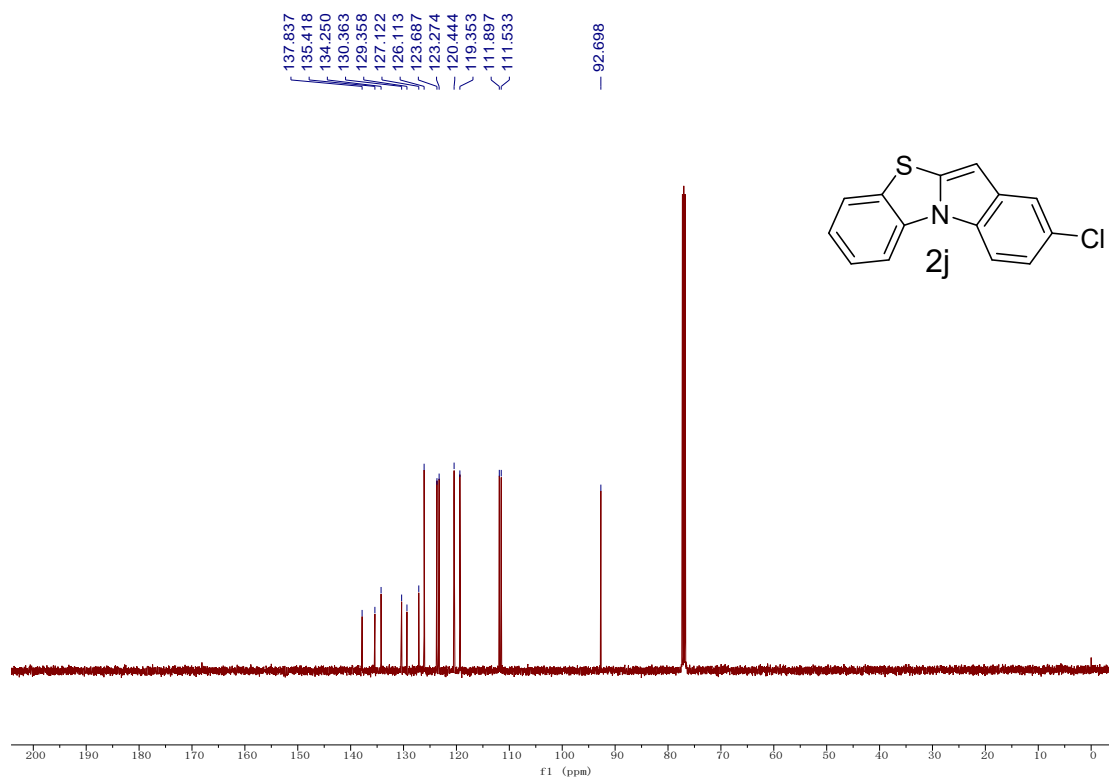

<sup>1</sup>H NMR (500 MHz, CDCl<sub>3</sub>)

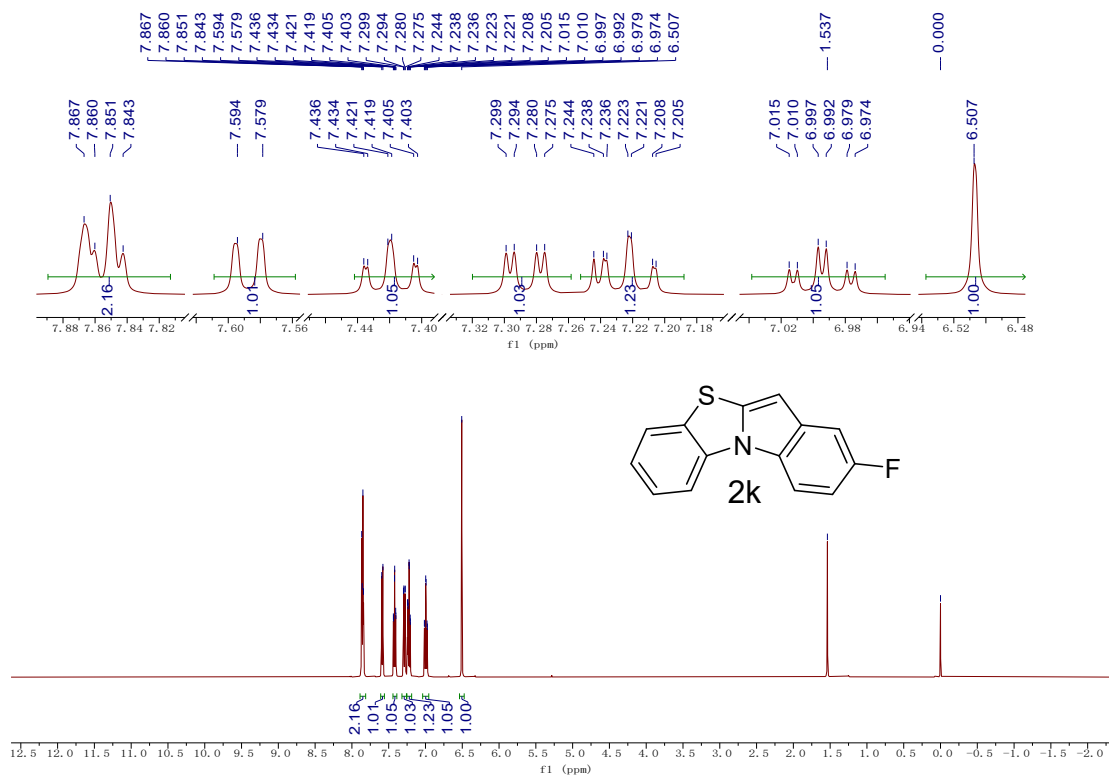

<sup>13</sup>C NMR (125 MHz, CDCl<sub>3</sub>)

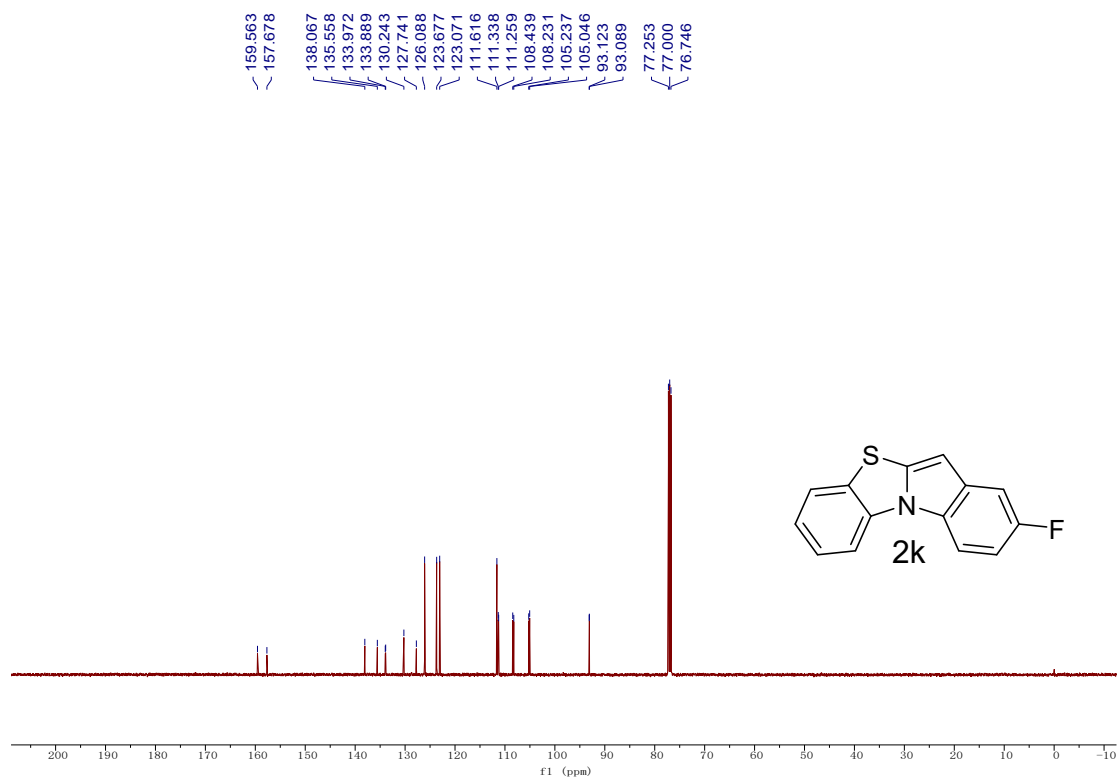

**<sup>1</sup>H NMR (600 MHz, CDCl<sub>3</sub>)**

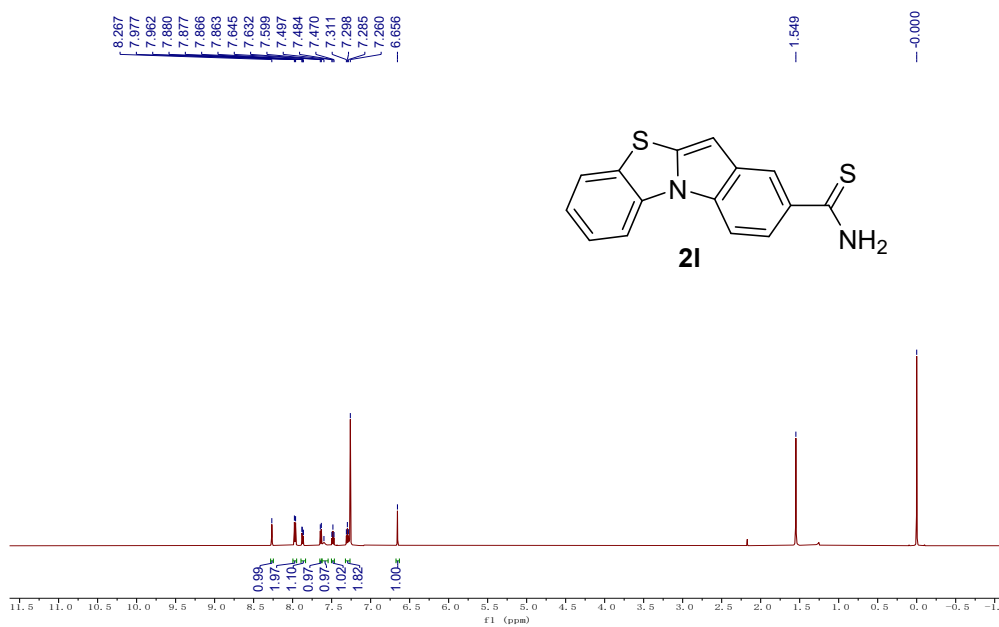

**<sup>13</sup>C NMR (125 MHz, DMSO)**

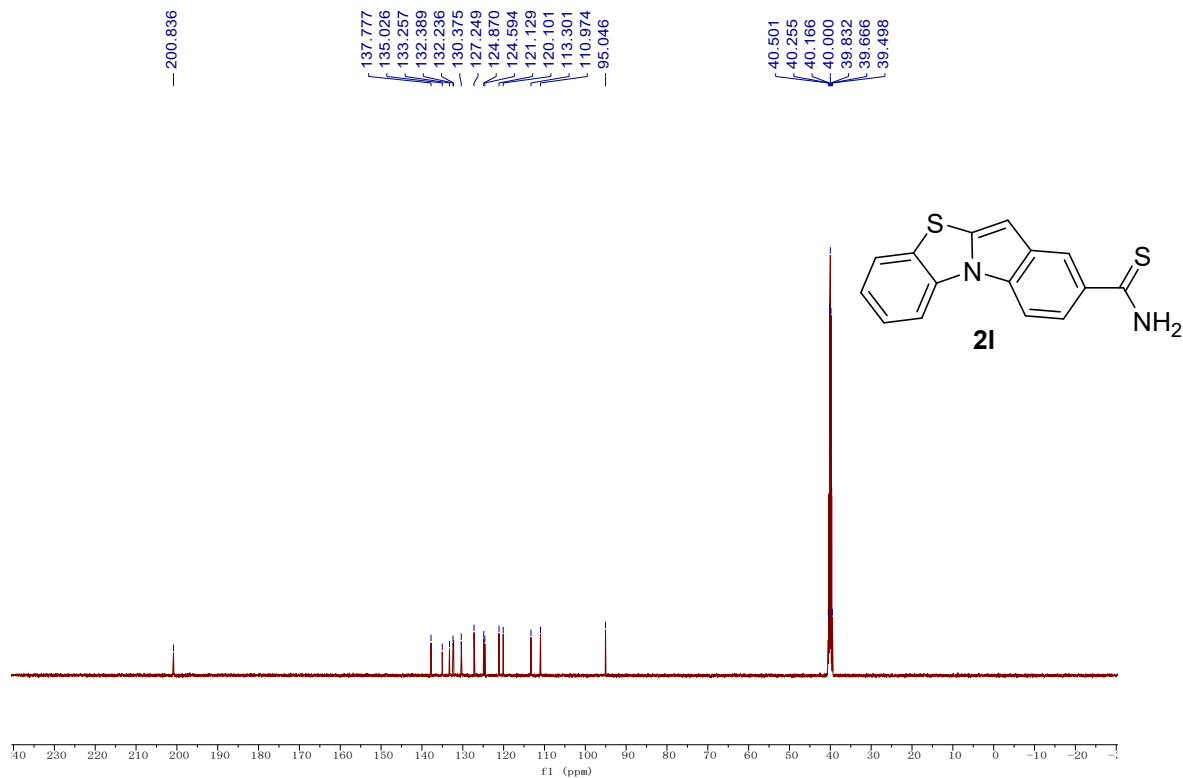

<sup>1</sup>H NMR (500 MHz, CDCl<sub>3</sub>)

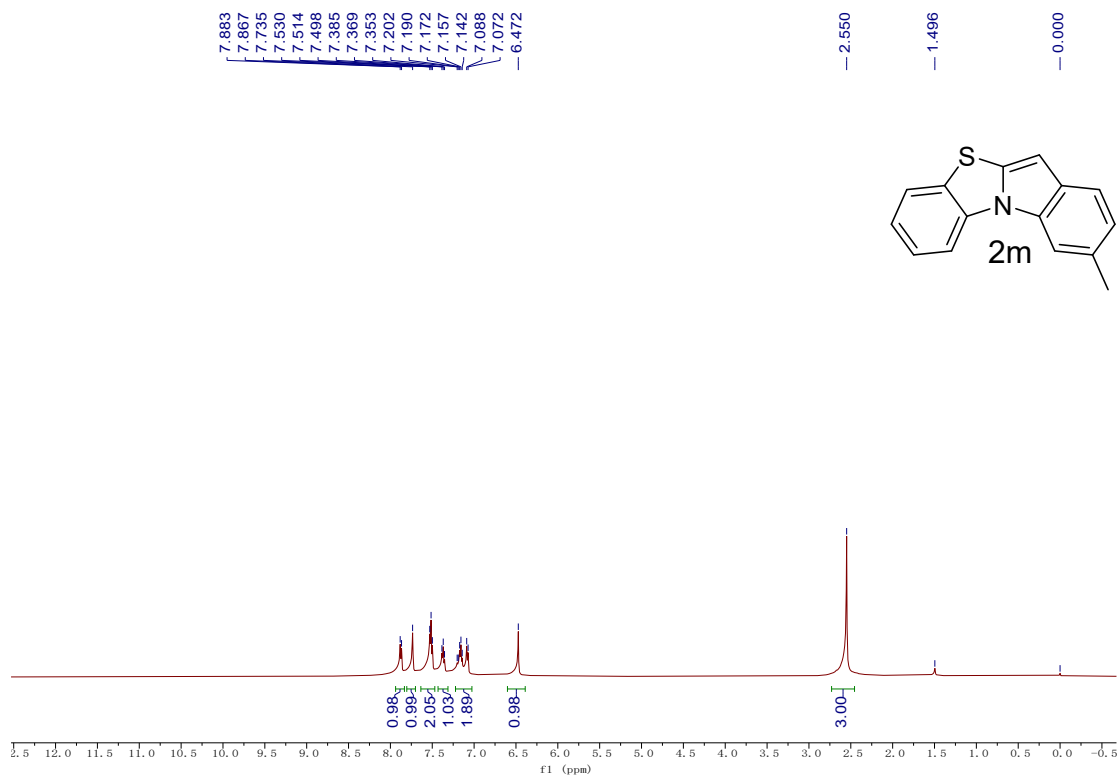

$^{13}\text{C}$  NMR (125 MHz,  $\text{CDCl}_3$ )

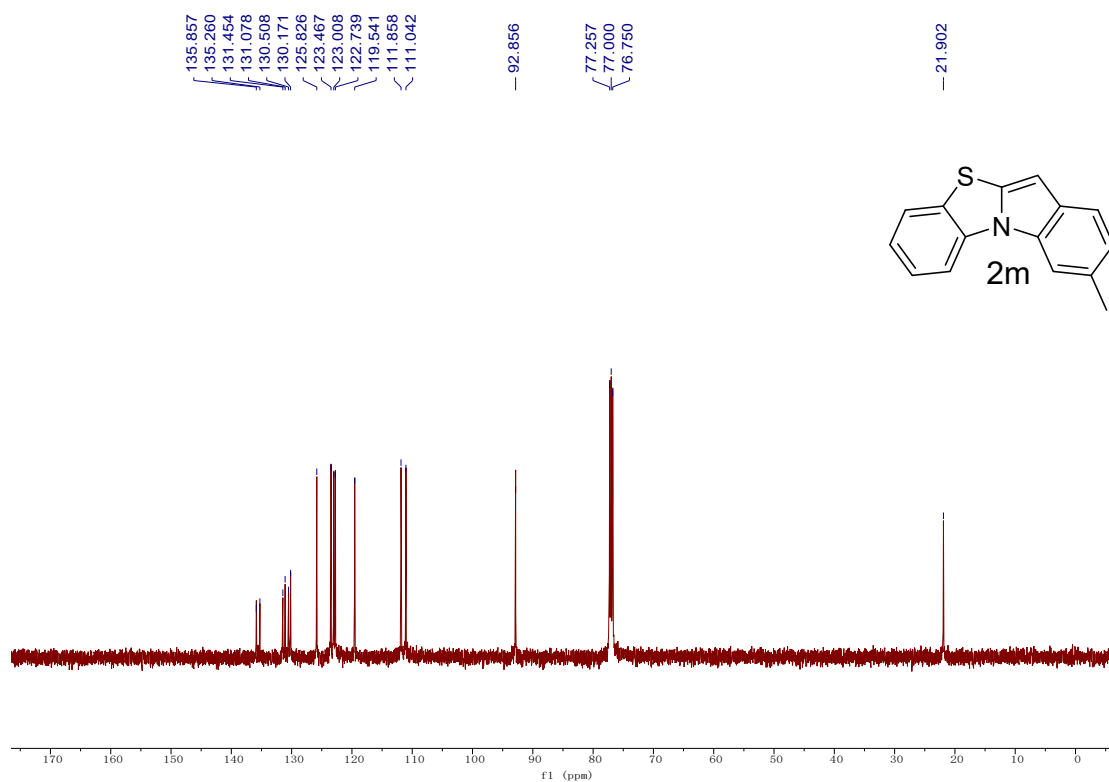

$^1\text{H}$  NMR (500 MHz,  $\text{CDCl}_3$ )

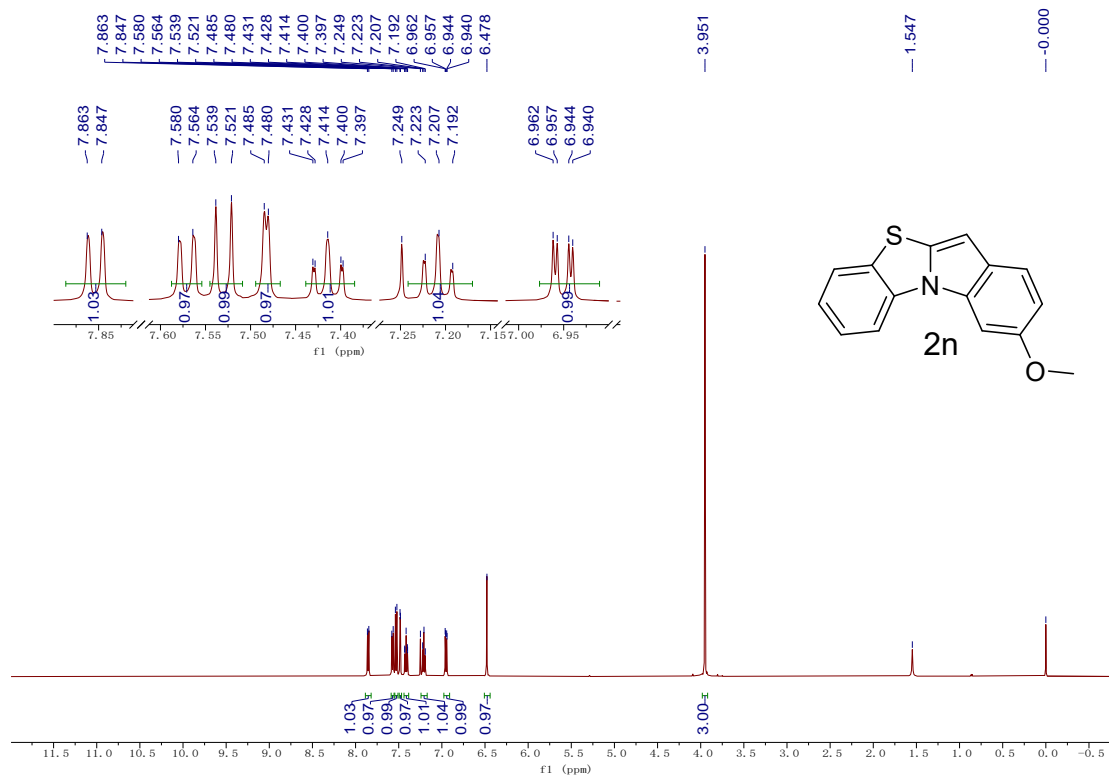

**<sup>13</sup>C NMR (125 MHz, CDCl<sub>3</sub>)**

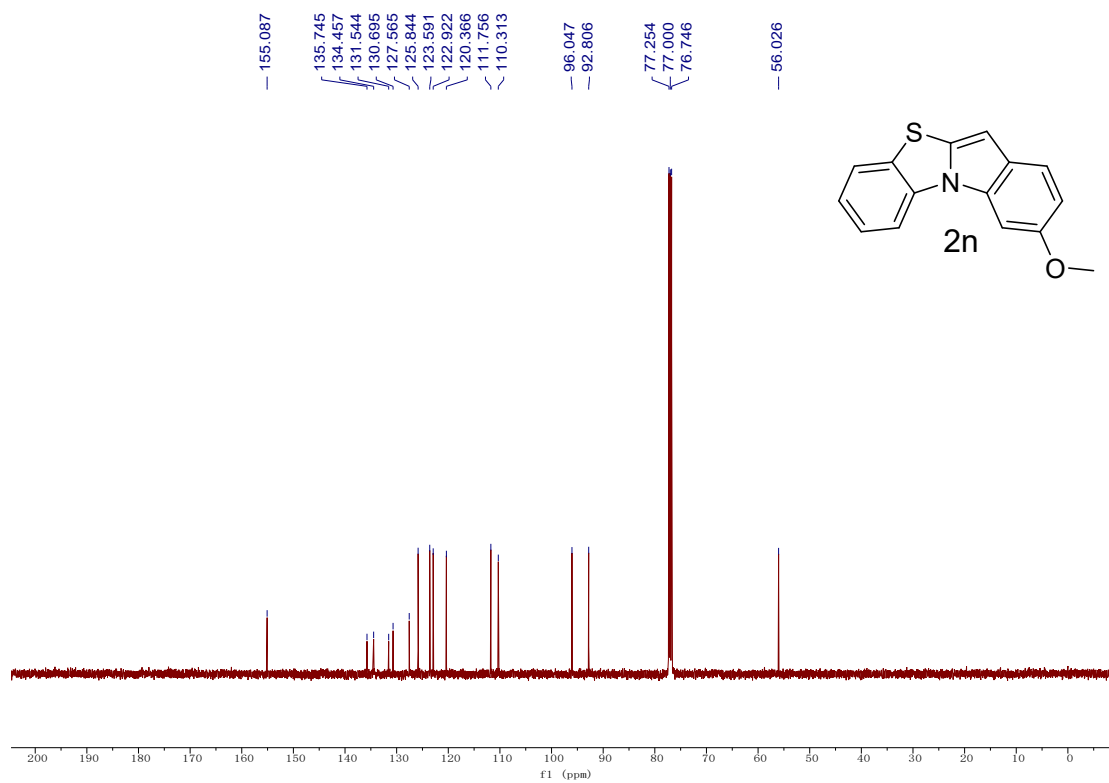

**<sup>1</sup>H NMR (500 MHz, CDCl<sub>3</sub>)**

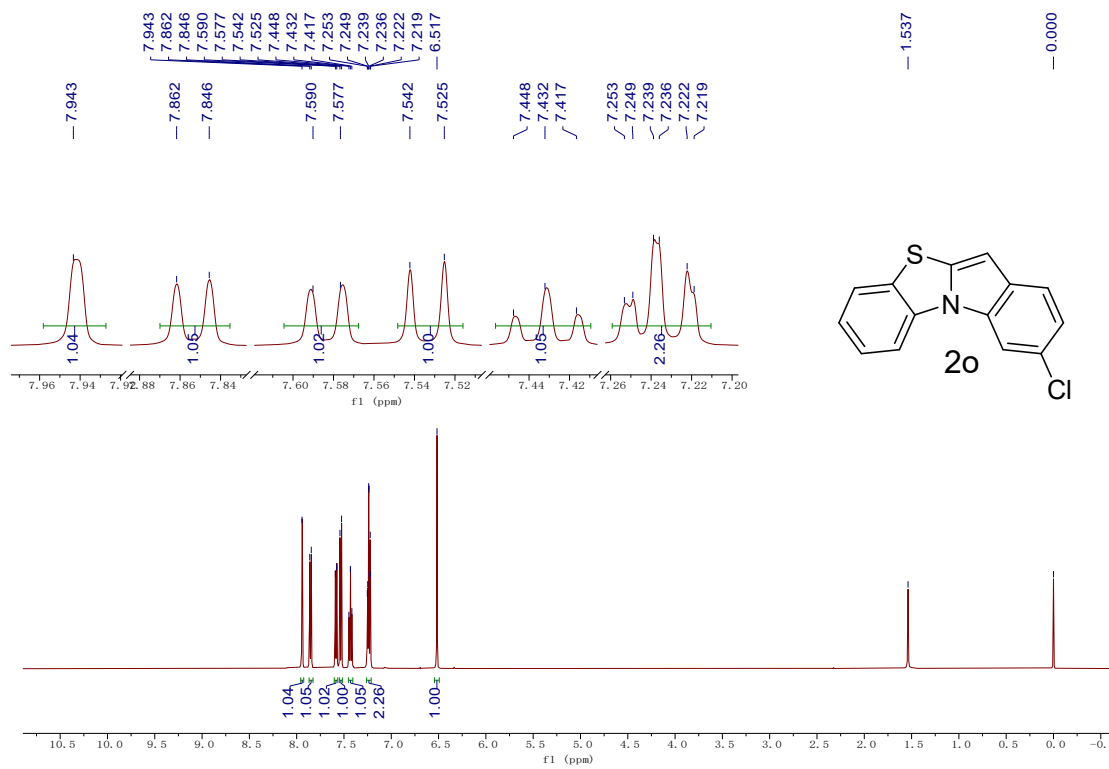

<sup>13</sup>C NMR (125 MHz, CDCl<sub>3</sub>)

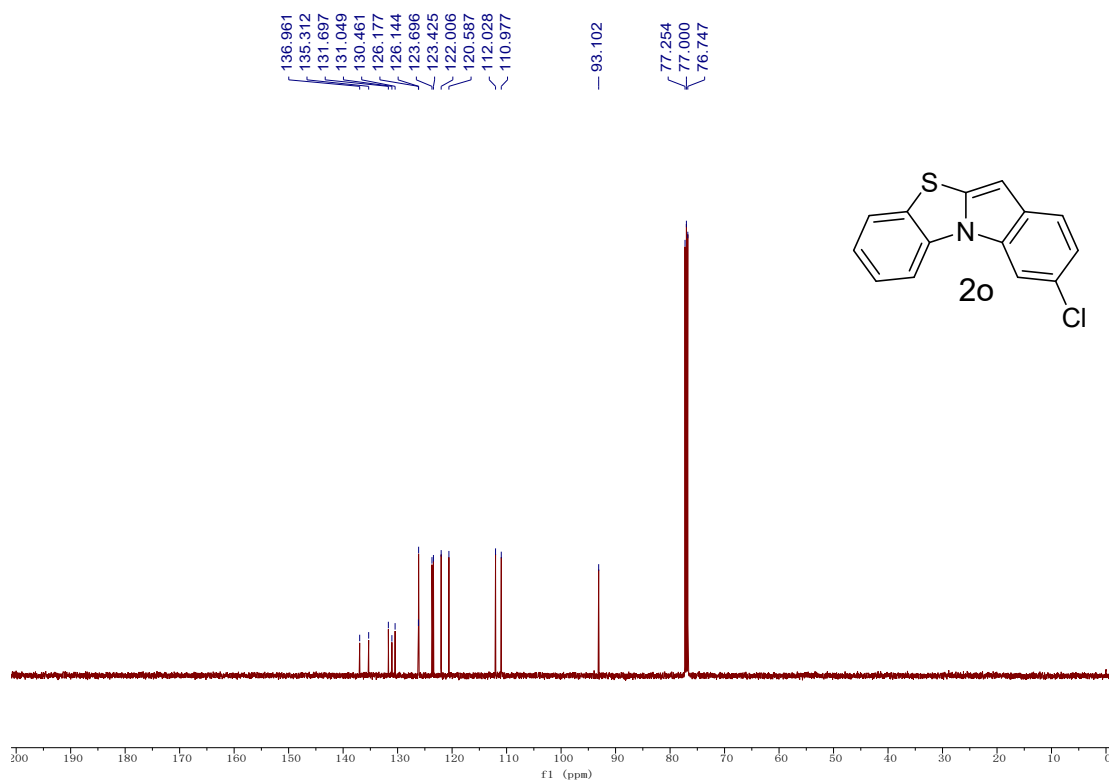

<sup>1</sup>H NMR (500 MHz, CDCl<sub>3</sub>)



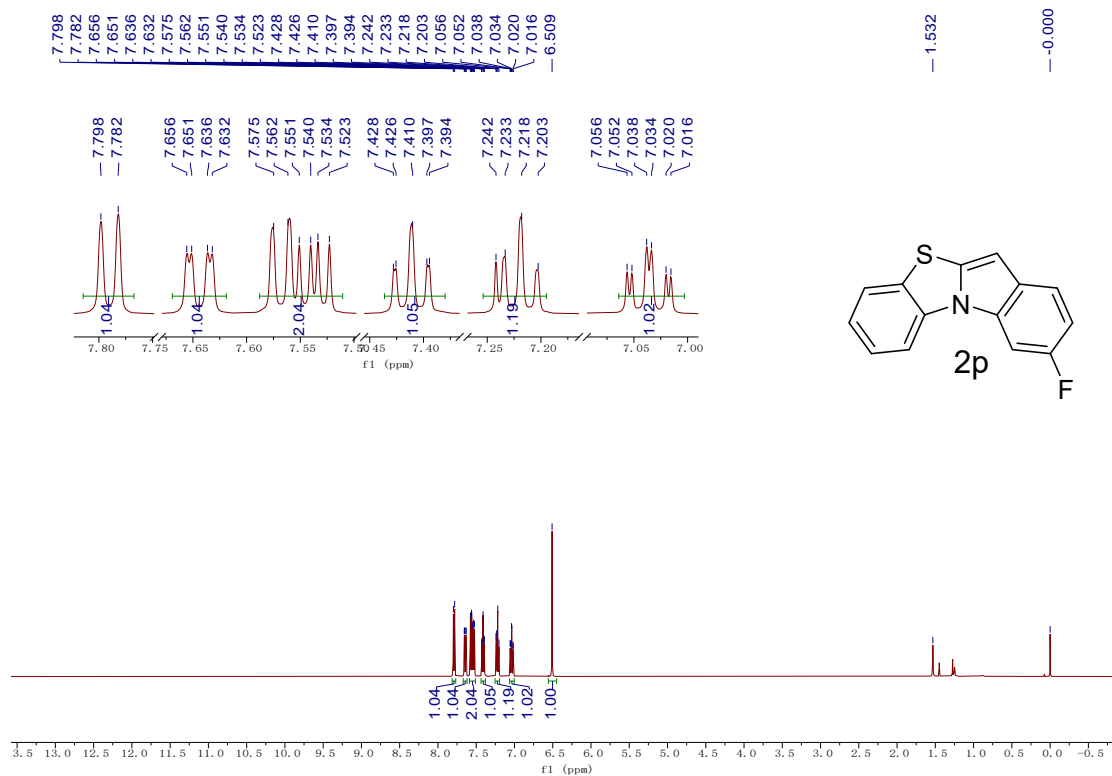

**<sup>13</sup>C NMR (125 MHz, CDCl<sub>3</sub>)**

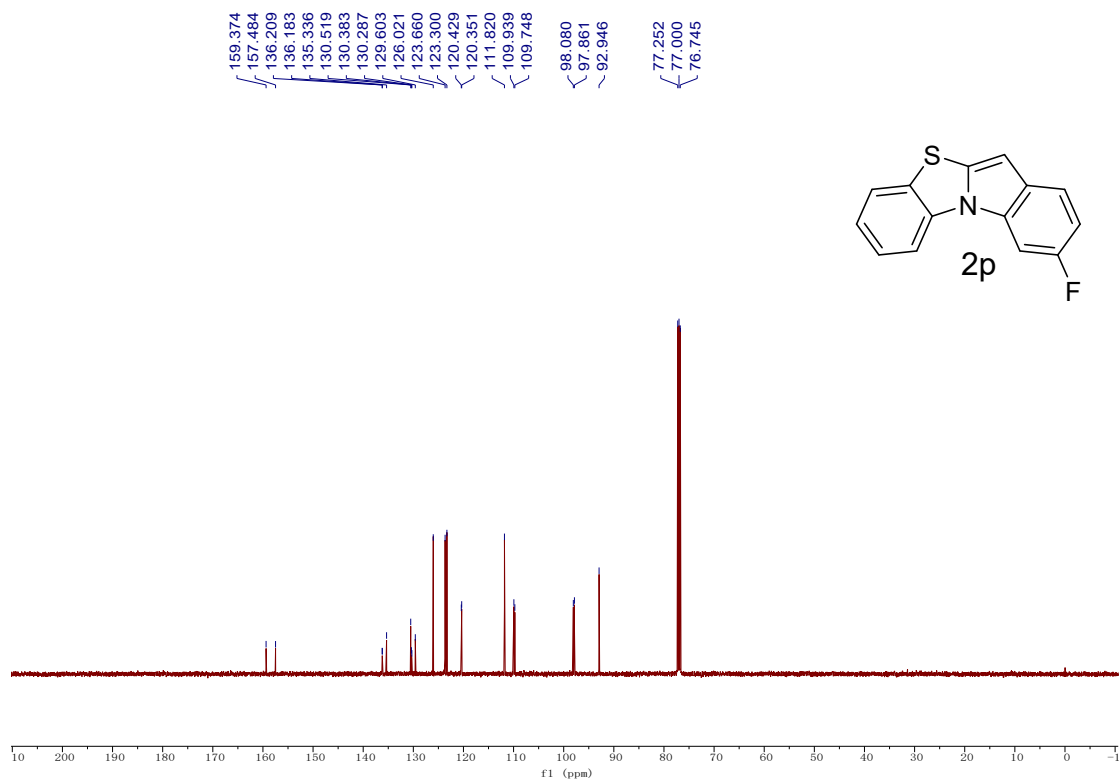

<sup>1</sup>H NMR (500 MHz, CDCl<sub>3</sub>)

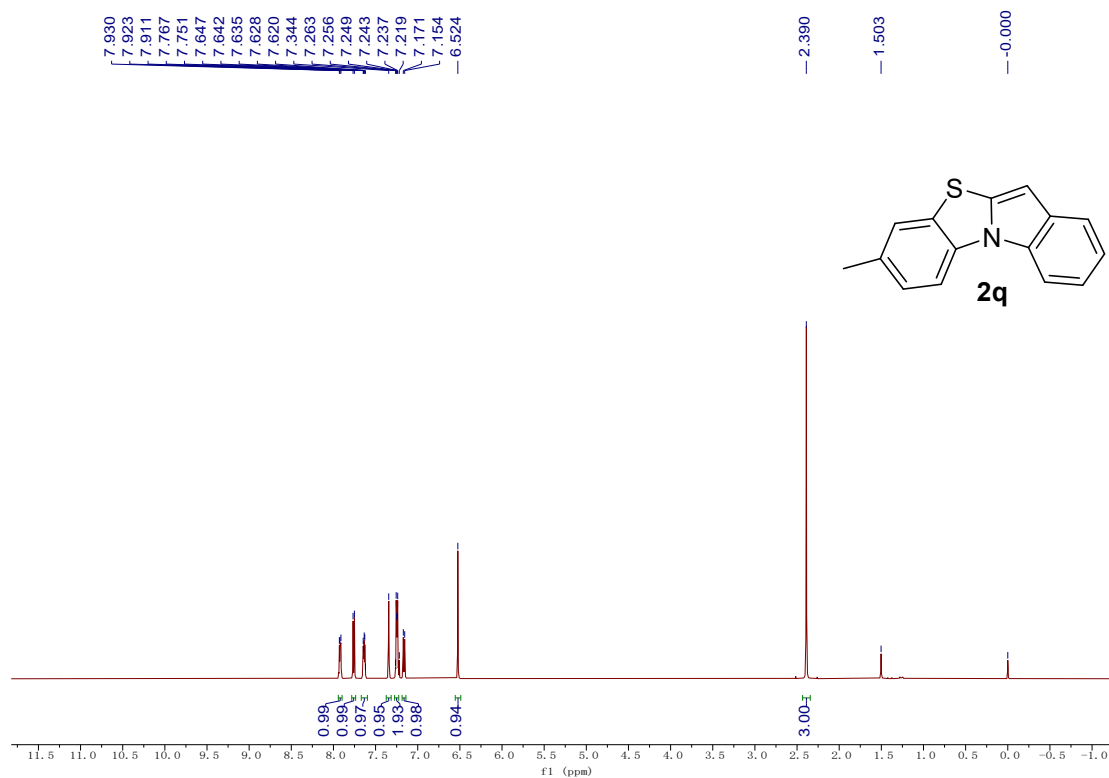

<sup>13</sup>C NMR (125 MHz, CDCl<sub>3</sub>)

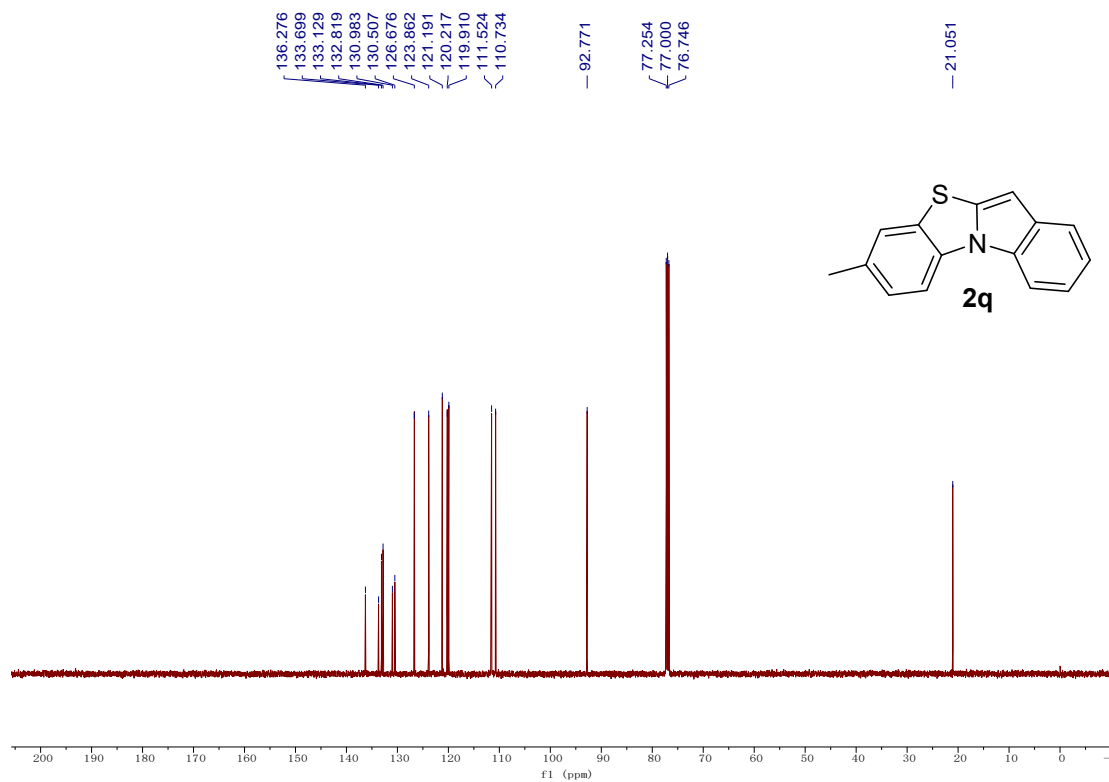

<sup>1</sup>H NMR (600 MHz, CDCl<sub>3</sub>)

7.929  
7.921  
7.914  
7.906  
7.825  
7.810  
7.874  
7.668  
7.658  
7.653  
7.559  
7.395  
7.381  
7.377  
7.303  
7.295  
7.291  
7.288  
7.286  
7.283  
7.280  
7.274  
7.271  
7.252  
6.568

-0.000

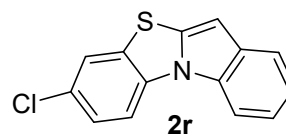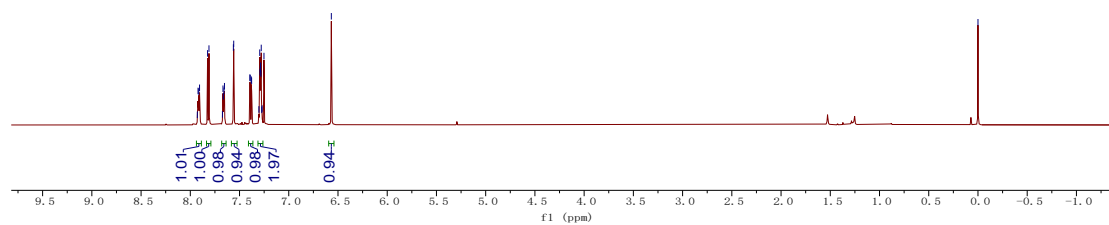

<sup>13</sup>C NMR (150 MHz, CDCl<sub>3</sub>)

135.834  
134.512  
133.228  
132.219  
130.970  
128.197  
126.101  
123.352  
121.709  
120.749  
120.218  
112.268  
110.678

93.631

77.210  
77.000  
76.787

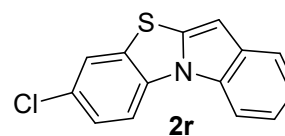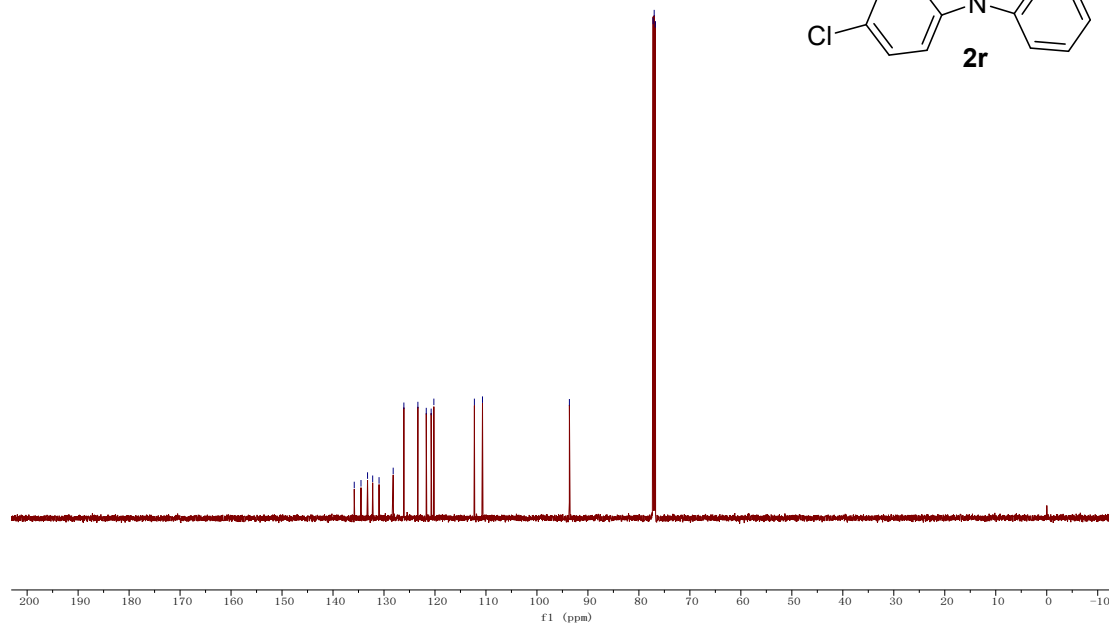



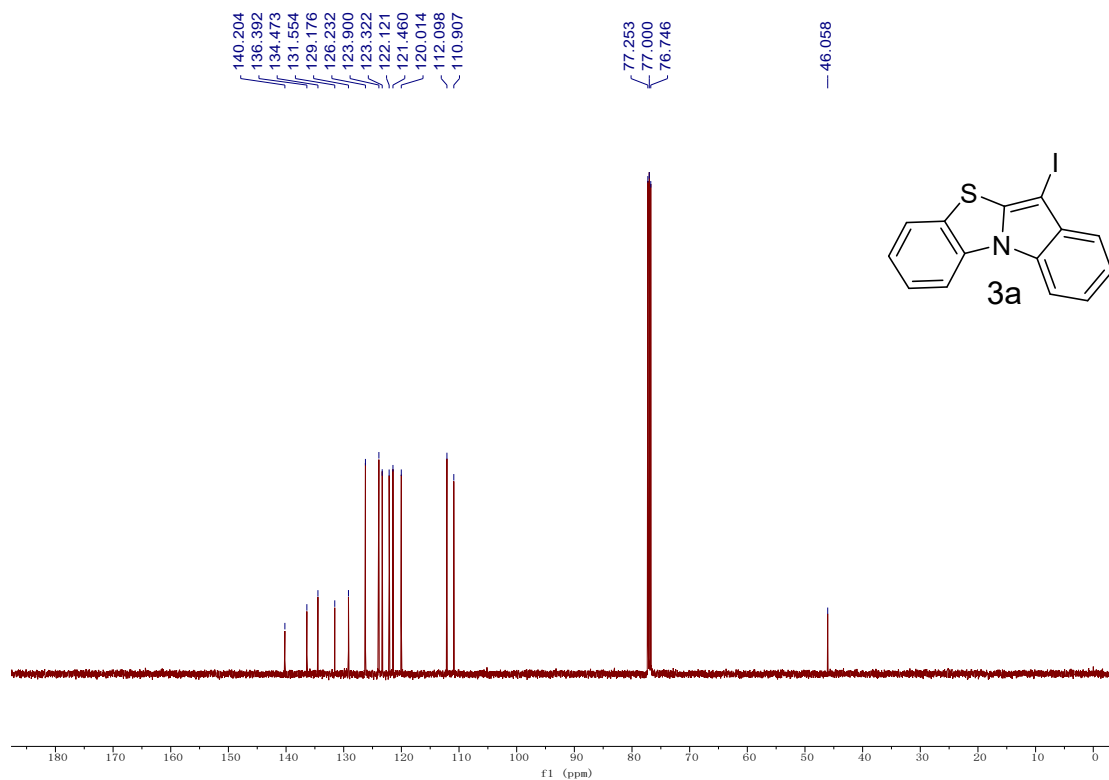

<sup>1</sup>H NMR (500 MHz, CDCl<sub>3</sub>)

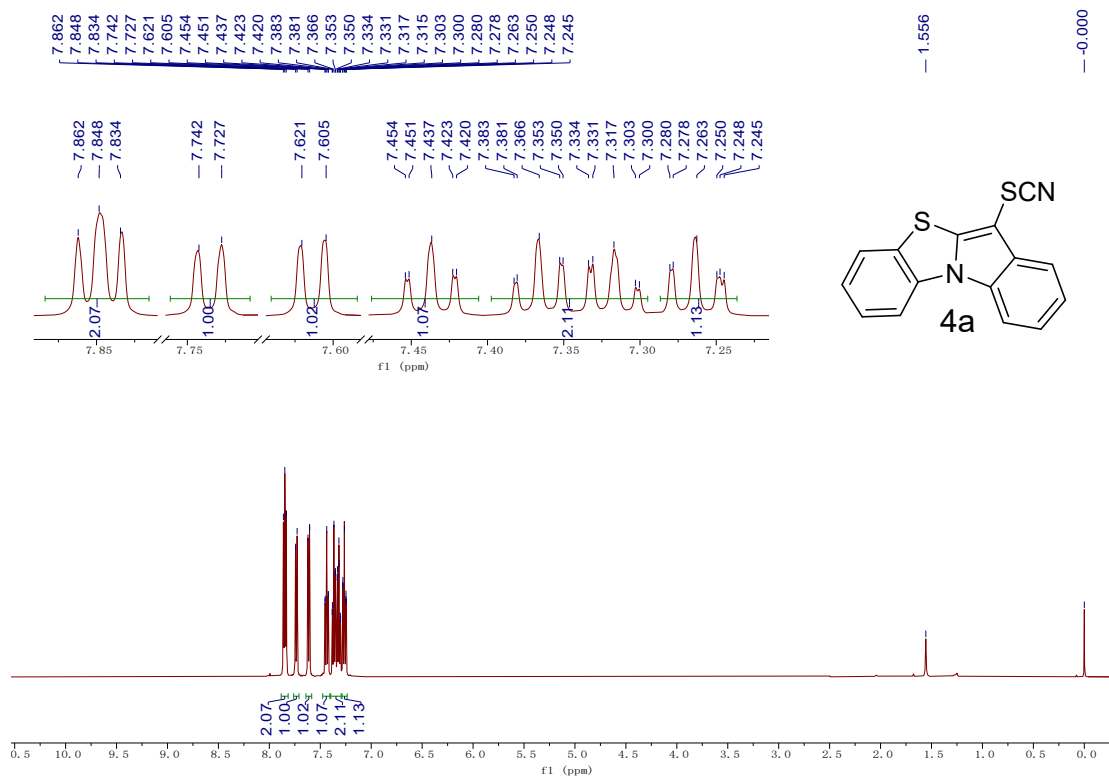

<sup>13</sup>C NMR (125 MHz, CDCl<sub>3</sub>)

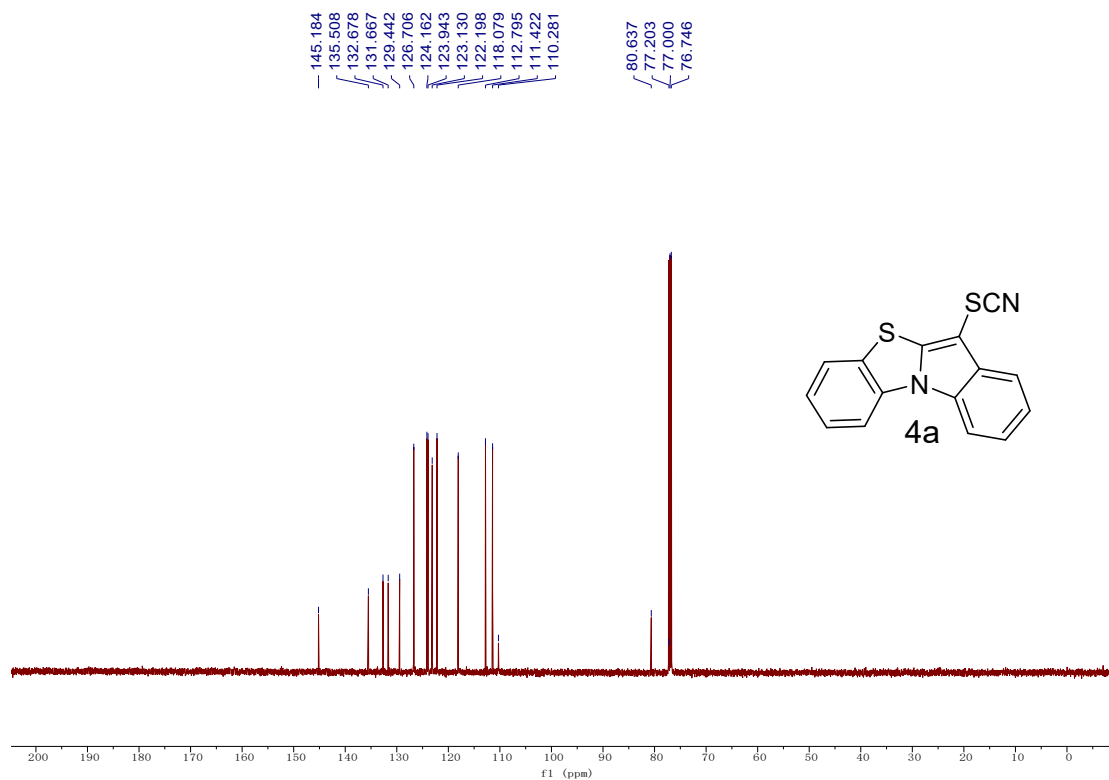

$^1\text{H}$  NMR (500 MHz,  $\text{CDCl}_3$ )

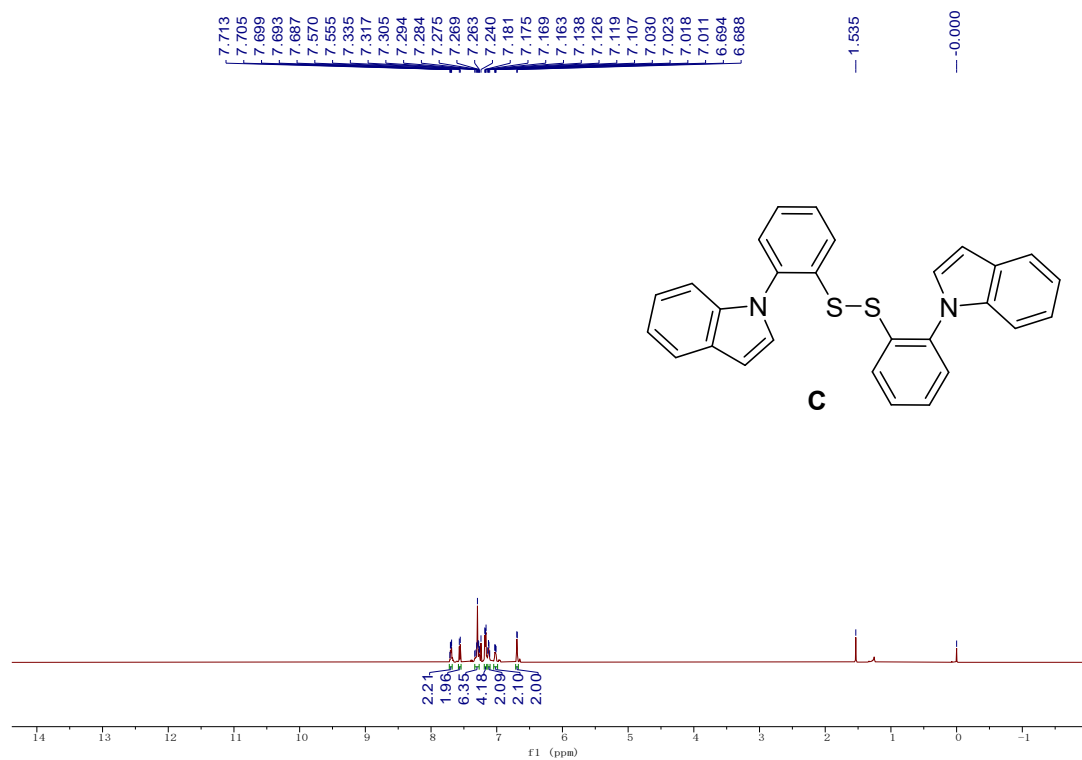

$^{13}\text{C}$  NMR (125 MHz,  $\text{CDCl}_3$ )

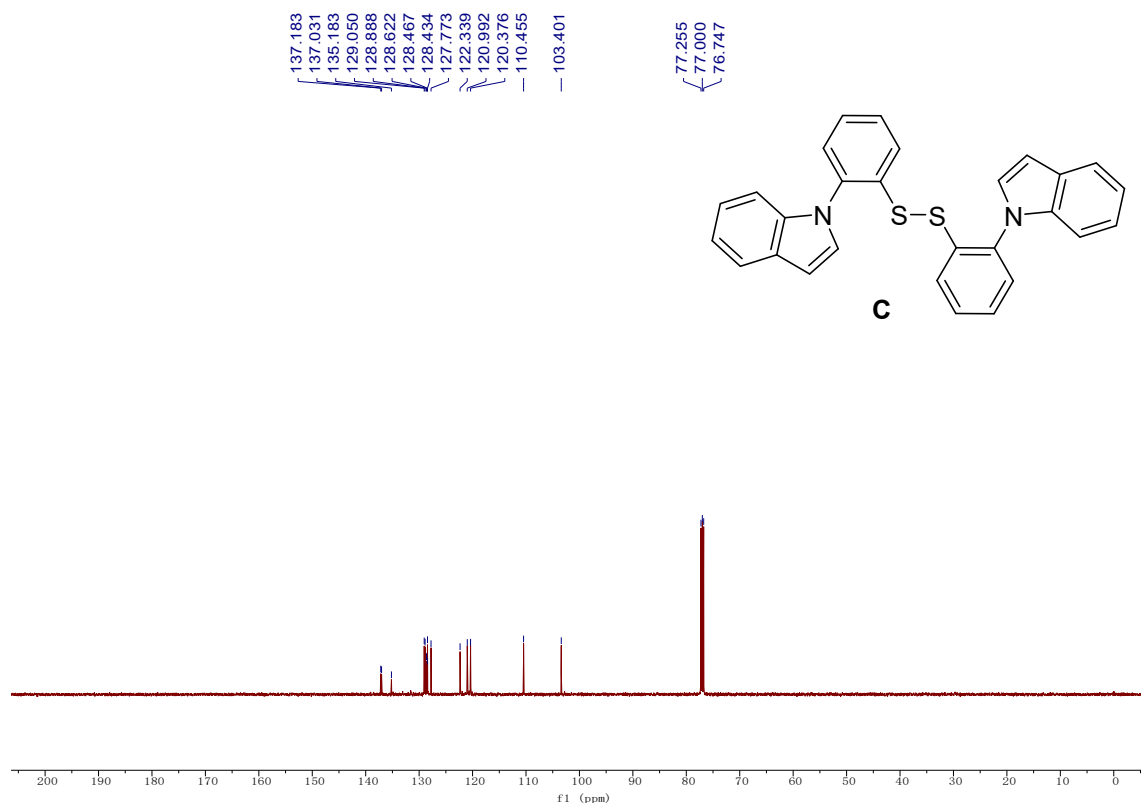

## 10. X-ray crystallography of compound 2a.

### *benzo[4,5]thiazolo[3,2-*a*]indole (2a, 2165685)*

(Ortep ellipsoids are depicted at the 50% level)

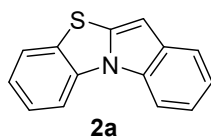

**Table S2. Crystal data and structure refinement for 2a.**

|                      |                                                                                               |
|----------------------|-----------------------------------------------------------------------------------------------|
| Identification code  | <b>2a</b>                                                                                     |
| Empirical formula    | C <sub>14.05</sub> H <sub>10.1</sub> NS <sub>0.95</sub>                                       |
| Formula weight       | 223.39                                                                                        |
| Temperature          | 296.15 K                                                                                      |
| Wavelength           | 1.54178 Å                                                                                     |
| Crystal system       | Monoclinic                                                                                    |
| Space group          | P 2 <sub>1</sub> /c                                                                           |
| Unit cell dimensions | a = 10.6100(7) Å, α = 90°.<br>b = 8.4073(5) Å, β = 103.775(2)°.<br>c = 12.0322(7) Å, γ = 90°. |
| Volume               | 1042.42(11) Å <sup>3</sup>                                                                    |
| Z                    | 4                                                                                             |
| Density (calculated) | 1.423 g/cm <sup>3</sup>                                                                       |

|                                   |                                           |
|-----------------------------------|-------------------------------------------|
| Absorption coefficient            | 2.365 mm <sup>-1</sup>                    |
| F(000)                            | 466.0                                     |
| Crystal size                      | 0.32 x 0.18 x 0.15 mm <sup>3</sup>        |
| Radiation                         | CuK $\alpha$ ( $\lambda$ = 1.54178)       |
| Theta range for data collection   | 8.58 to 144.912°.                         |
| Index ranges                      | -13<=h<=13, -10<=k<=10, -14<=l<=13        |
| Reflections collected             | 25614                                     |
| Independent reflections           | 2049 [R(int) = 0.0319, R(sigma) = 0.0162] |
| Completeness to theta = 26.000°   | 99.2 %                                    |
| Absorption correction             | MULTI-SCAN                                |
| Max. and min. transmission        | 0.754 and 0.616                           |
| Refinement method                 | Least Squares minimisation                |
| Data / restraints / parameters    | 2049 / 64 / 166                           |
| Goodness-of-fit on F <sup>2</sup> | 1.087                                     |
| Final R indices [I>2sigma(I)]     | R1 = 0.0344, wR2 = 0.0966                 |
| R indices (all data)              | R1 = 0.0352, wR2 = 0.0974                 |
| Largest diff. peak and hole       | 0.31 and -0.54 e.Å <sup>-3</sup>          |

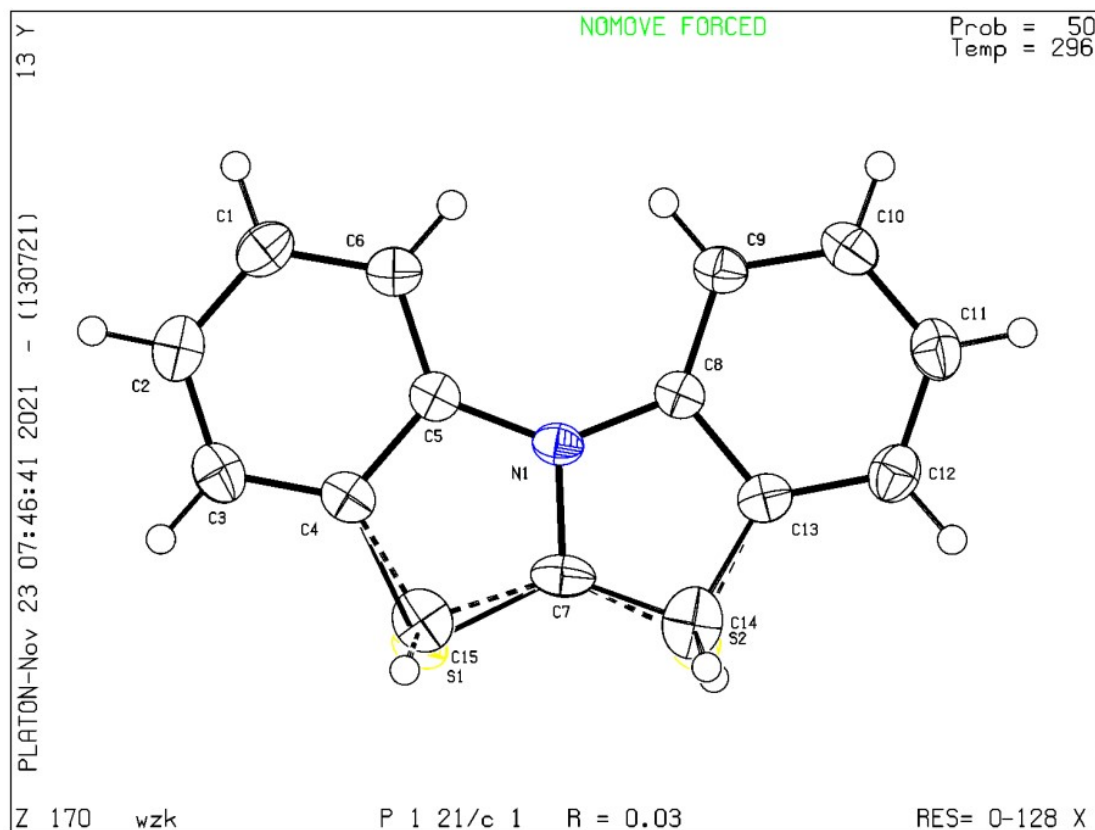

Supplement: d2nj05660g1.pdf [file d2nj05660g1.pdf]
